# Heterodimeric insecticidal peptide provides new insights into the molecular and functional diversity of ant venoms

Axel Touchard<sup>1‡</sup>, Helen C. Mendel<sup>2‡</sup>, Isabelle Boulogne<sup>3</sup>, Volker Herzig<sup>2,4</sup>, Nayara Braga Emidio<sup>2</sup>, Glenn F. King<sup>2</sup>, Mathilde Triquigneaux<sup>5</sup>, Lucie Jaquillard<sup>5</sup>, Rémy Béroud<sup>5</sup>, Michel De Waard<sup>5,6,7</sup>, Olivier Delalande<sup>8</sup>, Alain Dejean<sup>1,9</sup>, Markus Muttenthaler<sup>2,10\*</sup>, Christophe Duplais<sup>1\*</sup>

<sup>1</sup>CNRS, UMR Ecofog, AgroParisTech, Cirad, INRAE, Université des Antilles, Université de Guyane, 97310 Kourou, France

<sup>2</sup>Institute for Molecular Bioscience, The University of Queensland, St Lucia, Queensland 4072, Australia

<sup>3</sup>Université de ROUEN, UFR des Sciences et Techniques, Laboratoire Glycobiologie et Matrice Extracellulaire Végétale, UPRES-EA 4358, Fédération de Recherche « Normandie Végétal » FED 4277, 76821, Mont-Saint-Aignan, France

<sup>4</sup>School of Science and Engineering, University of the Sunshine Coast, Sippy Downs, Queensland 4556, Australia

<sup>5</sup>Smartox Biotechnology, 6 rue des Platanes, 38120 Saint Egrève, France.

<sup>6</sup>Université de Nantes, CNRS, INSERM, L'institut du thorax, 44000 Nantes, France.

<sup>7</sup>LabEx « Ion Channels, Science & Therapeutics », 06560 Valbonne, France

<sup>8</sup>Institute of Genetics and Development of Rennes (IGDR), CNRS UMR 6290, Université de Rennes Faculté de Pharmacie, 2 avenue du Professeur Léon Bernard, 35043 Rennes, France

<sup>9</sup>Ecolab, Université de Toulouse, CNRS, INPT, UPS, Toulouse, France

<sup>10</sup>Institute of Biological Chemistry, Faculty of Chemistry, University of Vienna, 1090, Vienna, Austria

<sup>‡</sup>These authors contributed equally to this work

\*Corresponding authors:

christophe.duplais@cnrs.fr, Orcid ID : 0000-0003-0926-9885

markus.muttenthaler@univie.ac.at, Orcid ID : 0000-0003-1996-4646

28 **Abstract**

29 Ants use venom for predation, defence and communication, however, the molecular diversity, function  
30 and potential applications of ant venom remains understudied compared to other venomous lineages  
31 such as arachnids, snakes and cone snails. In this work, we used a multidisciplinary approach that  
32 encompassed field work, proteomics, sequencing, chemical synthesis, structural analysis, molecular  
33 modelling, stability studies, and a series of *in vitro* and *in vivo* bioassays to investigate the molecular  
34 diversity of the venom of the Amazonian *Pseudomyrmex penetrator* ants. We isolated a potent  
35 insecticidal heterodimeric peptide  $\Delta$ -pseudomyrmecitoxin-Pp1a ( $\Delta$ -PSDTX-Pp1a) composed of a 27-  
36 residue long A-chain and a 33-residue long B-chain crosslinked by two disulfide bonds in an antiparallel  
37 orientation. We chemically synthesised  $\Delta$ -PSDTX-Pp1a, its corresponding parallel AA and BB  
38 homodimers, and its monomeric chains and demonstrated that  $\Delta$ -PSDTX-Pp1a had the most potent  
39 insecticidal effects in blow fly assays ( $LD_{50} = 3$  nM). Molecular modelling and circular dichroism studies  
40 revealed strong alpha-helical features, indicating its cytotoxic effects could derive from membrane  
41 disruption, which was further supported by insect cell calcium assays. The native heterodimer was also  
42 substantially more stable against proteolytic degradation ( $t_{1/2} = 13$  h) than its homodimers or monomers  
43 ( $t_{1/2} < 20$  min), indicating an evolutionary advantage of the more complex structure. The proteomic  
44 analysis of *Pseudomyrmex penetrator* venom and in-depth characterisation of  $\Delta$ -PSDTX-Pp1a provide  
45 novel insights in the structural complexity of ant venom, and further exemplifies how nature exploits  
46 disulfide-bond formation and dimerization to gain an evolutionary advantage *via* improved stability; a  
47 concept that is also highly relevant for the design and development of peptide therapeutics, molecular  
48 probes and bioinsecticides.

49

50 **Keywords**

51 Ant venom; Disulfide bond; Heterodimeric toxin; Cytotoxicity; Insecticide properties

52

53

## 54 Introduction

55 Hymenopterans are a large order of insects with ~120,000 described species and over 250 million years  
56 of evolution [1,2,3]. Many of their members, including ants, bees and wasps, use venom for predation,  
57 defence and communication. These venoms seem to be highly heterogeneous and structurally complex,  
58 with a wide range of bioactive constituents being reported including sugars, formic acid, biogenic  
59 amines, polyamines, alkaloids, and peptides [4,5]. Considering this immense chemical diversity and the  
60 high species richness of this order, hymenopterans can be considered a vast, yet understudied resource  
61 for the discovery of new biochemicals that complements venom from other, better studied species such  
62 as spiders, scorpions, snakes and cone snails. A systematic analysis of the chemical and structural  
63 diversity within hymenopteran venoms does not exist [4,5]. However, the high diversity of ant species  
64 with diverse ecology and evolutionary history predicts enormous potential for the discovery of bioactive  
65 peptides with novel structural scaffolds and pharmacology with applications in medicine and agriculture  
66 [6,7]. This potential has recently been illustrated by the discovery of a structurally unique ion channel  
67 ligand from the venom of the ant *Anochetus emarginatus* [8].

68       Ants belonging to the genus *Pseudomyrmex* possess venoms that rapidly subdue prey and  
69 effectively deter herbivores, suggesting that they contain both neurotoxic and cytotoxic compounds [9].  
70 They employ their venoms according to their nesting mode (i.e., terrestrial and arboreal species, and,  
71 among the latter, plant-ants or obligate inhabitants of myrmecophytes) [10]. A previous mass  
72 spectrometry (MS)-based survey of three *Pseudomyrmex* venoms revealed that the plant-ant species  
73 *Pseudomyrmex penetrator* (*P. penetrator*) contains uncharacterized linear peptides as well as disulfide-  
74 rich peptides, indicating a complex structural diversity of toxins that warrants further investigation [11].

75       Here, we studied the venom of *P. penetrator* through proteomics, cytotoxicity-guided venom  
76 fractionation, chemical synthesis, structure-activity relationship (SAR) studies, proteolytic stability  
77 assays, and *in vivo* characterisation of insecticidal activity.

78

79 **Results**

80 **Venom collection, mass spectrometry analysis and cytotoxicity-guided peptide isolation**

81 A total of 11.5 mg of dried crude venom was obtained by dissecting the venom sacs from 609  
82 *P. penetrator* workers (19  $\mu$ g of dried venom *per individual*). The total amount was substantial  
83 considering the small body size of *P. penetrator* workers (~5 mm) and is linked to the relatively large  
84 size of the venom sac, which is ~0.5 mm and occupies a large volume within the ant gaster (**Fig. 1 A**  
85 and **B**).

86

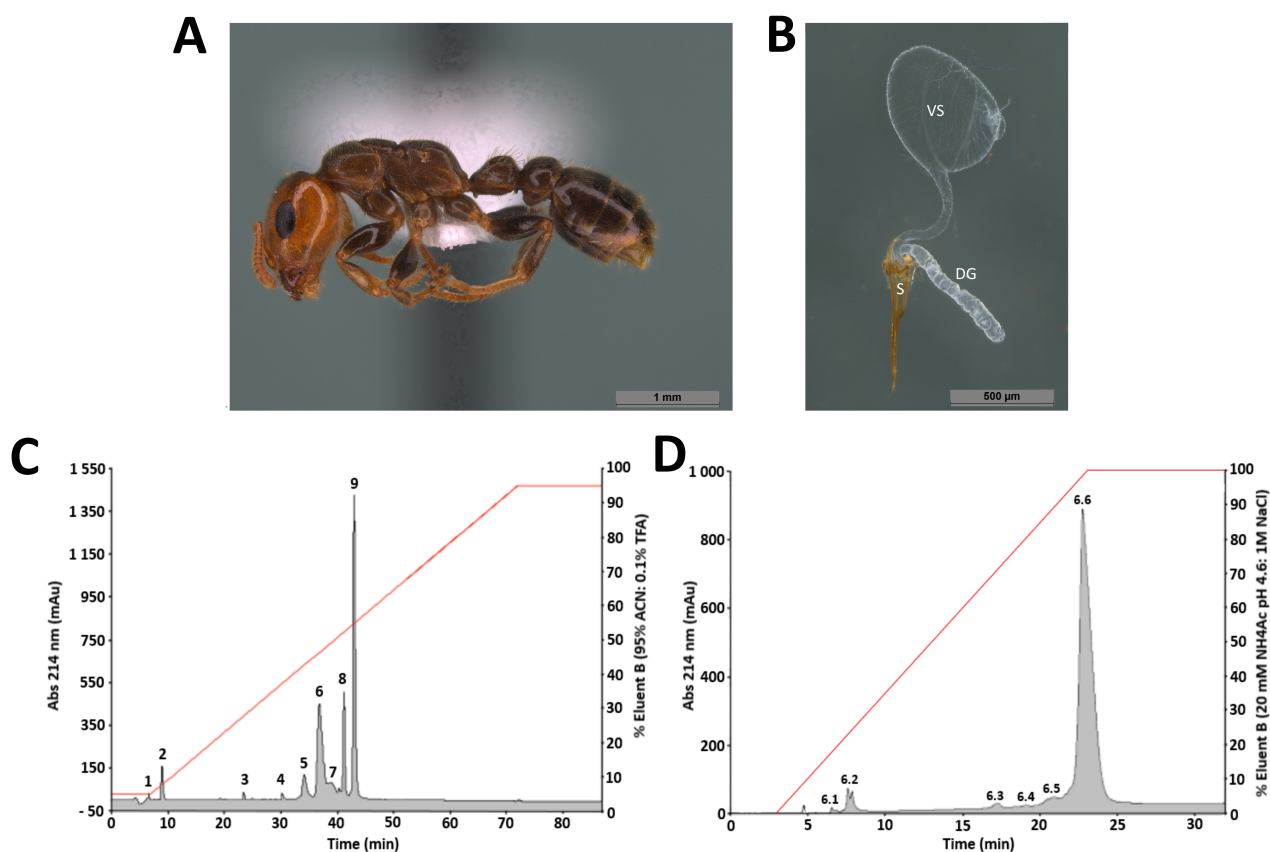

87

88 **Fig. 1 Venom peptide discovery from *P. penetrator* ants.** **A** Photo of a *P. penetrator* worker. **B** The  
89 venom sac (VS), Dufour's gland (DG) and sting (S) after dissection. **C** RP-HPLC chromatogram resulting  
90 from of *P. penetrator* crude venom fractionation on a C<sub>18</sub> column. Fractions labelled from 1 to 9 were  
91 selected for cytotoxicity assays on insect cells. Fraction 6 exhibited the highest cytotoxic activity. **D**  
92 Cation-exchange chromatogram of RP-HPLC fraction 6. Sub-fractions were labelled 6.1 to 6.6. Sub-



93 fraction 6.6 represented > 90% of the total fraction 6 content and contained the pure cytotoxic peptide  
94  $\Delta$ -PSDTX-Pp1a.

95

96 The cytotoxicity of the crude venom was assessed by measuring growth inhibition of *Aedes albopictus*  
97 mosquito C6/36 cells. *A. albopictus* is an important vector of mosquito-borne diseases, including  
98 dengue, yellow fever, chikungunya and Zika, and its widespread geographic redistribution puts a large  
99 population at risk of contracting these diseases [12]. *A. albopictus* C6/36 cells are therefore an important  
100 *in vitro* model for the discovery of novel cytotoxic compounds and development of novel insecticidal  
101 agents. Crude *P. penetrator* venom had potent cytotoxic activity with an IC<sub>50</sub> of 2  $\mu$ g/mL (**Table S1**). The  
102 crude venom was then screened in a cytometry assay to examine the effects on intracellular  
103 concentrations of calcium (Ca<sup>2+</sup>), sodium (Na<sup>+</sup>) and chloride (Cl<sup>-</sup>) ions in *A. albopictus* C6/36 cultures.  
104 Higher intracellular Ca<sup>2+</sup> concentrations were observed in cells treated with *P. penetrator* crude venom  
105 (**Fig. 2**). At very low concentrations (0.03 and 0.3  $\mu$ g/mL), the venom extract significantly elevated  
106 intracellular Ca<sup>2+</sup> concentration (p-value <0.0001 and <0.05 respectively). No effects were observed for  
107 Na<sup>+</sup> and Cl<sup>-</sup> ions.

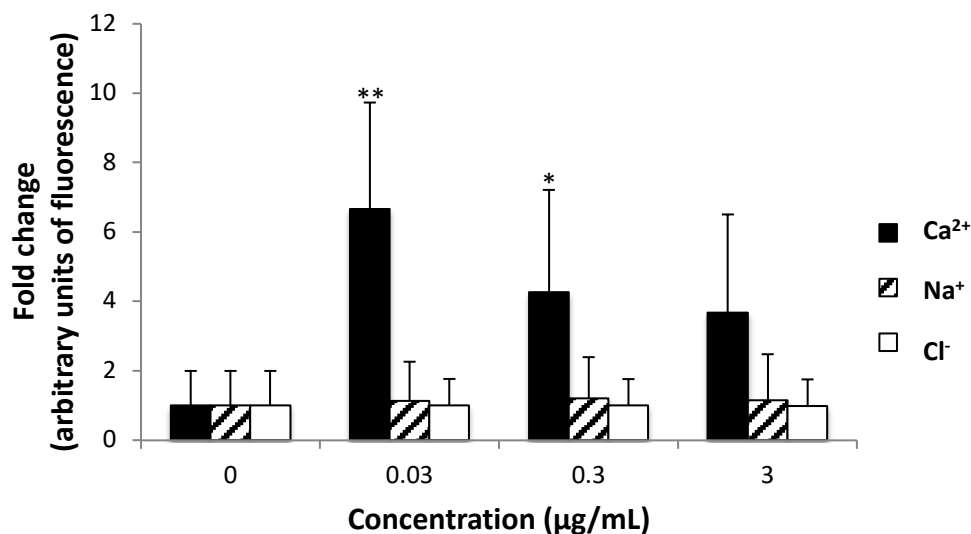

108

109 **Fig. 2 Cytometry assay of crude *P. penetrator* venom.** Fold change in fluorescence intensity as a  
110 proxy for intracellular Ca<sup>2+</sup> (black box), Na<sup>+</sup> (dashed box), Cl<sup>-</sup> (white box) concentrations in *A. albopictus*  
111 C6/36 cells treated with different concentrations of crude *P. penetrator* venom. Asterisks indicate

112 significant differences based on non-parametric analysis using the Kruskal-Wallis test with Dunn's  
113 multiple comparison test (with \*\* for p-values <0.0001 and \* for p-values < 0.05). Results based on four  
114 independent experiments (standard deviation error bars).

115

116 Fractionation of the crude venom using reversed-phase high-performance liquid  
117 chromatography (RP-HPLC) revealed nine peaks, with just three main (peaks 6, 8 and 9) constituting  
118 >60% of the crude venom mass (**Fig. 1C**). The monoisotopic masses of peptides in peaks 4–9 were  
119 determined by electrospray ionisation quadrupole time-of-flight mass spectroscopy (ESI-Q-TOF MS)  
120 and compared with the monoisotopic masses identified in a previous study [11] (**Table S1**). Peaks 1-3  
121 had no defined mass and were not tested in the bioassays. A total of sixteen different peptide masses  
122 were identified ranging from 649.4–7242.1 Da including three homo- and heterodimeric peptides  
123 (5955.4, 6598.8, 7242.1 Da). Nine of the sixteen masses were previously reported [11] (**Table S1**).

124 The cytotoxicity of the nine RP-HPLC fractions were tested on *A. albopictus* cells (**Table S2**).  
125 Five of these fractions were cytotoxic (fractions 5 to 9). Fraction 6 was the most potent one with cytotoxic  
126 activity (IC<sub>50</sub> 3.16 µg/mL) similar to the whole crude venom. Fraction 6 was further sub-fractionated by  
127 cation exchange chromatography and a heterodimeric peptide with a monoisotopic mass of 6598.8 Da  
128 was isolated (**Fig. 1D, Fig. S2**). This newly discovered ant venom peptide was highly cytotoxic to *A.*  
129 *albopictus* cells (IC<sub>50</sub> 1.04 µM) and named Δ-pseudomyrmecitoxin-Pp1a (Δ-PSDTX-Pp1a) following  
130 established nomenclature [4]. Δ indicates peptides with cytolytic activity, PSDTX denotes peptides from  
131 ants of the subfamily Pseudomyrmecinae, 'Pp' are genus/species descriptors, and "1a" is for  
132 distinguishing paralogous peptides from the same venom [13].

133

#### 134 **Δ-PSDTX-Pp1a sequence determination, chemical synthesis and *in silico* modelling**

135 Δ-PSDTX-Pp1a was sequenced using a combination of chemical reduction with dithiothreitol, Edman  
136 degradation, enzymatic digestion and *de novo* MS sequencing (**Table S3**). This yielded the sequence  
137 of a heterodimeric peptide comprised of a 27-residue A-chain with a C-terminal amide and a 33-residue  
138 B-chain with a C-terminal acid. Each chain contains two cysteine residues, which covalently link the two

139 chains through two disulfide bonds. Enzymatic degradation and MS analysis revealed an antiparallel  
140 orientation of the heterodimer with a disulfide bond connectivity of Cys<sub>A</sub><sup>I</sup>-Cys<sub>B</sub><sup>II</sup> and Cys<sub>A</sub><sup>II</sup>-Cys<sub>B</sub><sup>I</sup> (**Fig. 3**).  
141 Both peptide chains are highly cationic (predicted isoelectric point of 9.93 for A-chain and 9.70 for B-  
142 chain) and highly homologous to each other (85% sequence identity). In addition to being highly cationic  
143 (net charge of +7 for the A-chain and +6 for the B-chain) they are amphiphilic (41% and 45%  
144 hydrophobic residues, for A- and B-chain, respectively) (**Fig. S1**).

145 To further study  $\Delta$ -PSDTX-Pp1a, we chemically synthesized this peptide *via* Fmoc-SPPS (9-  
146 fluorenylmethyloxycarbonyl-solid phase peptide synthesis) in combination with a directed folding  
147 strategy using orthogonally protected cysteine building blocks with acetamidomethyl (Acm) and trityl  
148 (Trt) groups (**Fig. 3**). The first disulfide bond formation and dimerization step was carried out in a 1:1.5  
149 ratio mixture of reduced A- and B-chains in aqueous buffer (0.5:0.75 mM A-chain:B-chain, 0.1 M  
150 NH<sub>4</sub>HCO<sub>3</sub>, 25°C, pH 8.3, 48 h) resulting in the expected three products, the A-B heterodimer and the  
151 two homodimers (A-A, B-B), all connected by a single bond. Following RP-HPLC purification, each  
152 product was subjected to iodine oxidation to remove the Acm group and to form the second interchain  
153 disulfide bond, thereby producing the fully folded antiparallel heterodimer and the two parallel  
154 homodimers. The synthetic heterodimer was confirmed to be identical to native  $\Delta$ -PSDTX-Pp1a by a  
155 RP-HPLC coelution study and comparison of the high-resolution mass and MS fragmentation patterns  
156 (**Fig. S2**). In addition to the dimeric peptides, the single A- and B-chain were synthesized using the same  
157 Fmoc-SPPS methodology but without Acm protected cysteine residues to obtain the reduced linear A-  
158 and B-chain monomers (**Fig. S3, S4**).

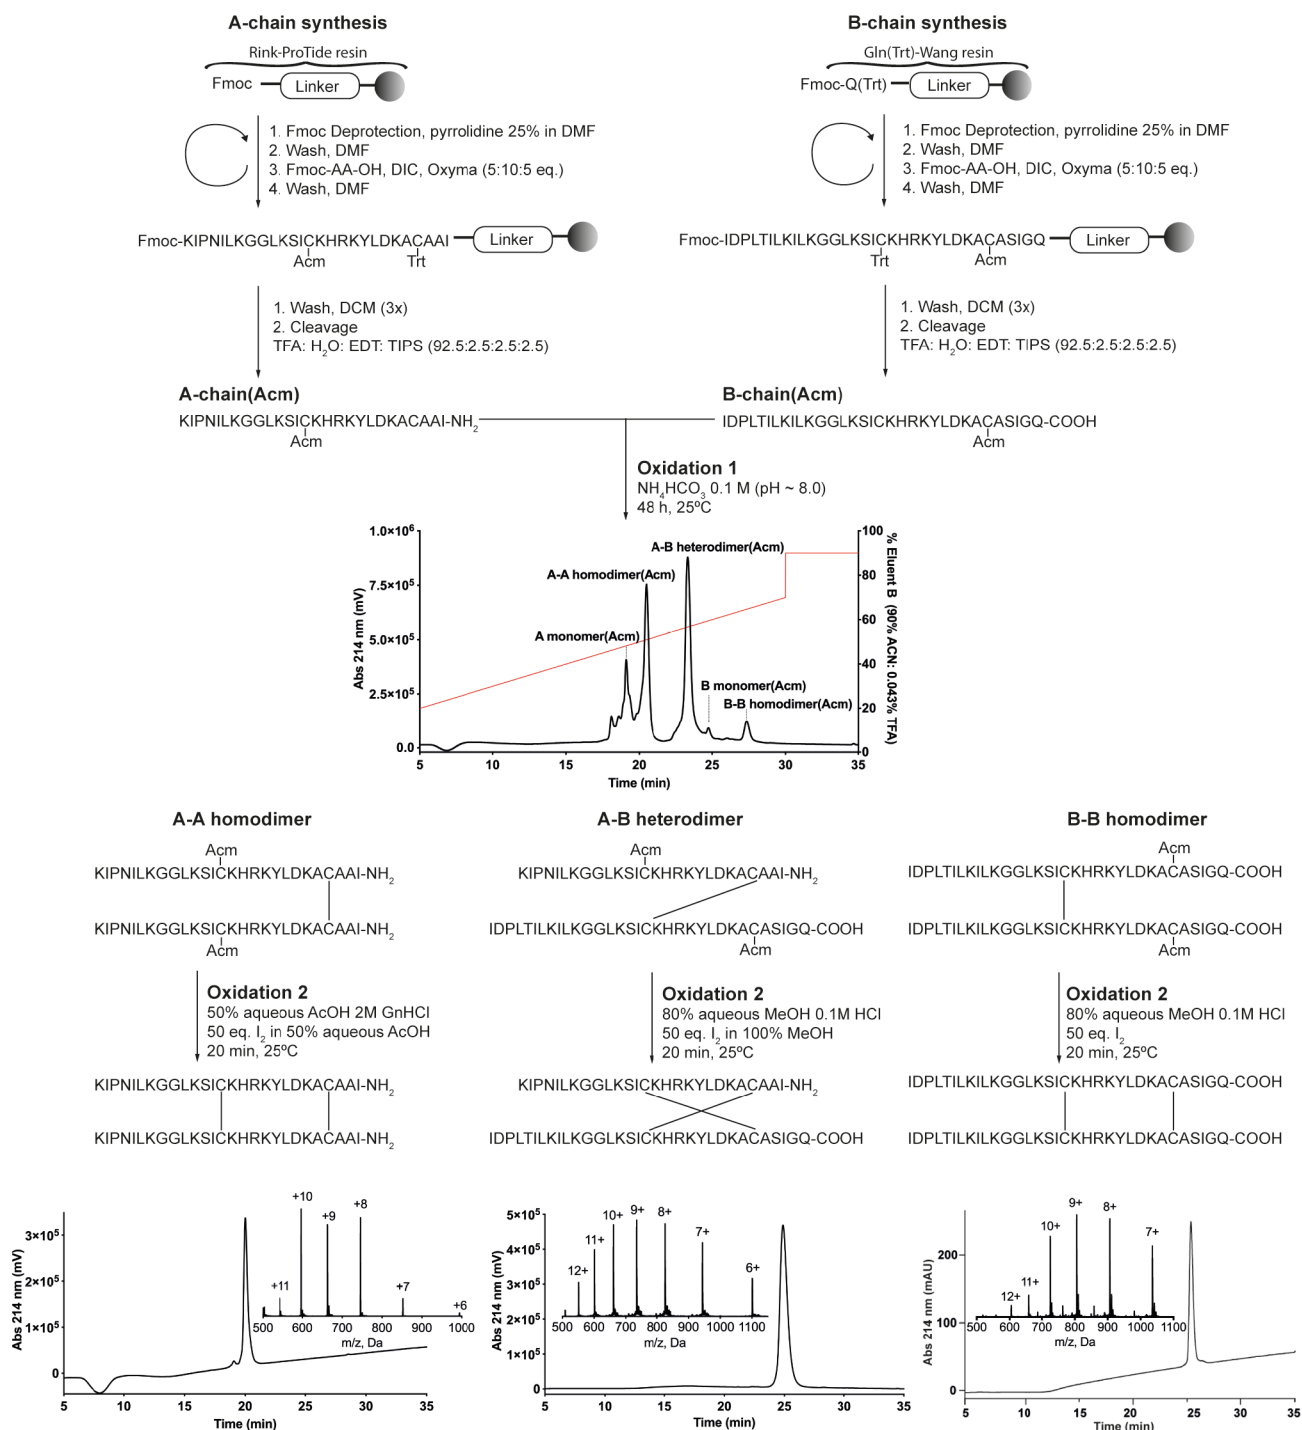

159

160 **Fig. 3 Chemical synthesis of antiparallel heterodimeric  $\Delta$ -PSDTX-Pp1a and the A-chain and B-**  
 161 **chain homodimers.** A-chain and B-chain peptides were assembled using Fmoc-SPPS and purified  
 162 using RP-HPLC. Cysteine residues were differentially protected: A-chain Cys<sup>A</sup><sub>I</sub> and B-chain Cys<sup>B</sup><sub>II</sub> were  
 163 protected with acetamidomethyl (Acm) and A-chain Cys<sup>A</sup><sub>II</sub> and B-chain Cys<sup>B</sup><sub>I</sub> with trityl (Trt). Upon  
 164 treatment with trifluoroacetic acid (TFA), the peptides were deprotected and released from the resin;

165 Cys<sub>A</sub><sup>I</sup> and Cys<sub>B</sub><sup>II</sup> remained protected with Acm. Subsequent folding (oxidation 1) produced the single  
166 disulfide bond connected A-B heterodimer and the A-A and B-B homodimers. Acm deprotection and  
167 formation of the second interchain disulfide bond (oxidation 2) produced the fully folded A-B heterodimer  
168 and A-A and B-B parallel homodimers. After cleavage and after each oxidation, peptides were purified  
169 *via* preparative C<sub>18</sub> RP-HPLC, lyophilised and analysed using analytical RP-HPLC and MS. Measured  
170 isotope peaks for the final dimer products are listed in Table S4.

171

172 To assess whether the structural or surface properties of the hetero- and homodimer peptides  
173 could affect their activity and stability,  $\Delta$ -PSDTX-Pp1a and the parallel A- and B-chain homodimers were  
174 modelled *in silico* using the *de novo* PEP-fold method [14] and molecular dynamics (MD) using the  
175 Amber forcefield as implemented in Yasara [15] (**Fig. 4**). The A-chain was predicted to have a N-terminal  
176  $3_{10}$ -helix (Iso<sub>A</sub>2-Lys<sub>A</sub>7) and an  $\alpha$ -helix (Leu<sub>A</sub>10-Lys<sub>A</sub>22) while the B-chain was predicted to contain two  
177 successive  $\alpha$ -helices (Pro<sub>B</sub>3-Gly<sub>B</sub>12 and Leu<sub>B</sub>14-Iso<sub>B</sub>31) (**Fig. 4A**). The C-terminal  $\alpha$ -helices of  $\Delta$ -  
178 PSDTX-Pp1a are packed together in a compact non-coiled coil structure stabilized by two disulfide  
179 bonds (**Fig. 4B**). Most of the hydrophobic and hydrophilic residues are largely surface exposed even  
180 though the lateral chain of Asp<sub>B</sub>25 is buried in the cationic core of the A-B heterodimer (**Fig. 4C**). This  
181 negatively charged residue likely forms a strong electrostatic interaction with the Lys<sub>A</sub>15 and Lys<sub>A</sub>18 of  
182 the A chain and contributes to inter-chain stability and facilitates close packing of the C-terminal  $\alpha$ -  
183 helices. The  $\Delta$ -PSDTX-Pp1a heterodimer is highly cationic with clusters of solvent-exposed Lys, Arg,  
184 His and Ser side chains, leading to an overall hydrophilic surface on one side of the heterodimer. By  
185 contrast, the other side is mostly hydrophobic except for a central hydrophilic core (**Fig. 4D**). A circular  
186 dichroism (CD) study of  $\Delta$ -PSDTX-Pp1a confirmed the presence of the predicted  $\alpha$ -helical secondary  
187 structure *via* a positive band at 190 nm and two negative bands at 208 nm and 222 nm (**Fig. 4E**).

188 Notably, the predicted structure of the two homodimers revealed a disordered helical  
189 conformation and a decrease of overall  $\alpha$ -helicity in comparison to the antiparallel heterodimer (**Fig. S5**  
190 and **S6**). These disordered helical structures of both homodimers appear to be the consequence of  
191 negative interactions between similar charged residues (**Fig. S5A-D**). The BB-homodimer has similar

192 surface properties to  $\Delta$ -PSDTX-Pp1a, albeit the hydrophobic patches are more dispersed, while the AA-  
 193 homodimer has the least hydrophobic surface. Based on this structural characterization, the three  
 194 dimers appear to have an amphipathic character where cationic residues represent a discontinuity within  
 195 the hydrophobic patches. Therefore, it was hypothesized that the cytotoxicity activity of  $\Delta$ -PSDTX-Pp1a  
 196 arises from an interaction with cell membranes as often reported with such cationic amphipathic  $\alpha$ -helical  
 197 peptides [16,17].

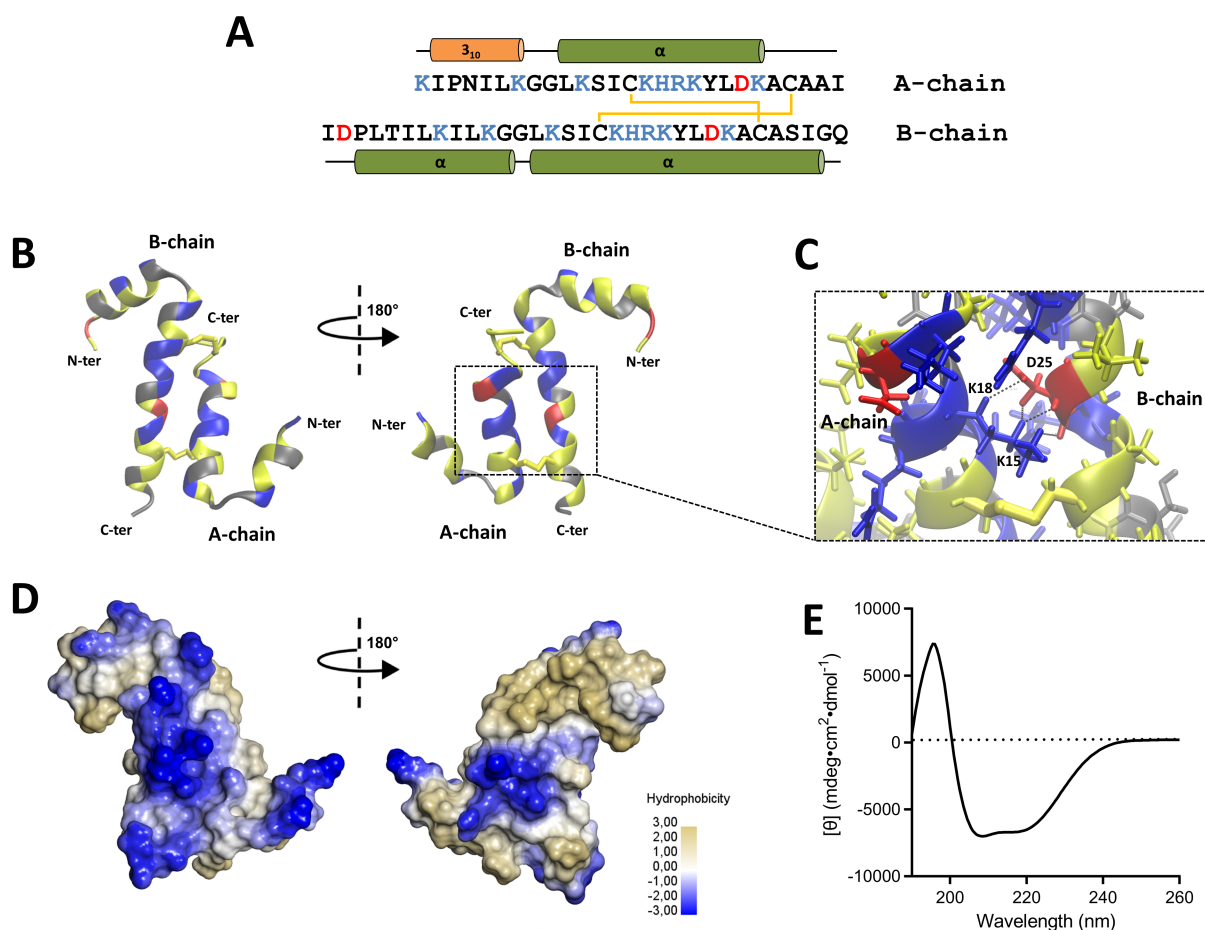

198

199 **Fig. 4 Structural analysis of  $\Delta$ -PSDTX-Pp1a.** **A** Amino acid sequence of  $\Delta$ -PSDTX-Pp1a with cationic  
 200 and anionic residues in blue and red, respectively. Schematic representation of the predicted secondary  
 201 structure of  $\Delta$ -PSDTX-Pp1a is shown above and below the sequences. **B** Most representative geometry  
 202 for the heterodimeric  $\Delta$ -PSDTX-Pp1a peptide after clustering of a 40 ns molecular dynamics simulation.  
 203 The cationic residues are in blue, anionic residues in red, polar non-charged residues in grey and  
 204 hydrophobic amino acids in yellow. **C** Expanded view of the central hydrophilic core showing the buried

205 side chain of Asp<sub>B</sub>25. **D** Molecular surface representation of  $\Delta$ -PSDTX-Pp1a highlighting the  
206 predominance of hydrophilic patches. **E** CD spectra of  $\Delta$ -PSDTX-Pp1a dissolved in sodium phosphate,  
207 pH 7.4.

208

## 209 Insecticidal and stability study

210 To gain insights into the ecological role and potential evolutionary advantage of these heterodimeric  
211 peptides, a structural class of toxins commonly reported in ant venoms, we embarked on a comparative  
212 investigation of insecticidal activity and stability of the  $\Delta$ -PSDTX-Pp1a heterodimer along with the two  
213 parallel homodimers and the A- and B-chain reduced monomers. Insecticidal activity was tested *in vivo*  
214 by intrathoracic injection into sheep blowflies (*Lucilia cuprina*), a serious agricultural pest commonly  
215 used as a model organism to monitor the insecticidal activity of venom peptides [18]. The  $\Delta$ -PSDTX-  
216 Pp1a heterodimer as well as the A- and B-chain homodimers exhibited the most potent insecticidal  
217 effects, with both A- and B-chain monomers being significantly less potent (**Fig. 5** and **Table S5**). For  
218 the homo- and heterodimeric peptides, contractile paralysis developed almost instantly while the flies  
219 were still attached to the injection needle and was fully developed when fly behaviour was first measured  
220 at 30 min after injection. At higher doses, paralysed flies did not recover with most being dead at 24 h  
221 post-injection.

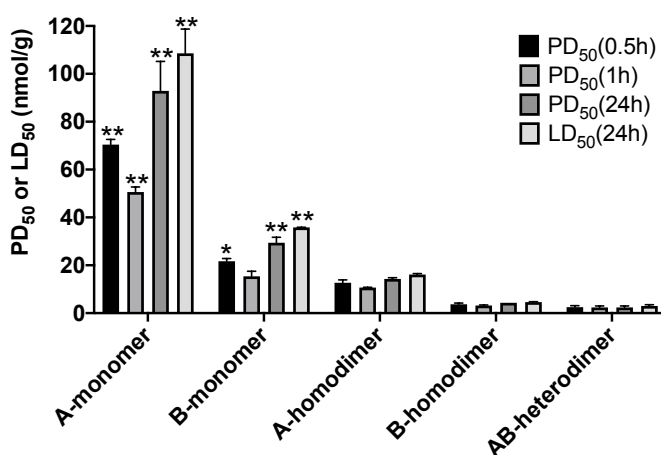

222

223 **Fig. 5. Insecticidal activity of  $\Delta$ -PSDTX-Pp1a.** Paralytic and lethal effects of monomeric (A, B),  
224 homodimeric (AA, BB) and heterodimeric (AB)  $\Delta$ -PSDTX-Pp1a analogues when injected into sheep



225 blowflies (*L. cuprina*). Statistical significance is based on a two-way ANOVA followed by Tukey's post  
226 hoc test and indicated by \* ( $p < 0.01$ ) and \*\* ( $p < 0.0001$ ) as compared against the respective PD<sub>50</sub> and  
227 LD<sub>50</sub> values of the heterodimeric  $\Delta$ -PSD<sub>TX</sub>-Pp1a. Error bars represent the standard error of the mean.  
228

229 We then tested the proteolytic stability of the peptides by incubating them with proteinase K, a  
230 broad-spectrum serine protease which cleaves peptides bonds at the C-terminal side of aromatic and  
231 aliphatic residues and is used to test protein/peptide stability as it typically ( $37^\circ\text{C}$ , pH = 7.5). Both the  
232 monomers and parallel homodimers were degraded within 20 min with nearly identical kinetics. By  
233 contrast, the heterodimer was exceptionally resistant to proteolytic degradation with a half-life ( $t_{1/2}$ ) of 13  
234 h, making it >39-fold more stable than the monomers and homodimers. This is particularly impressive  
235 considering that the heterodimer contains 24 potential proteinase K cleavage sites dispersed throughout  
236 both peptide chains (Fig. S7).  $\Delta$ -PSD<sub>TX</sub>-Pp1a was also very stable to heat, with a stable half-life of ~13  
237 h at  $90^\circ\text{C}$  (Fig. S8).

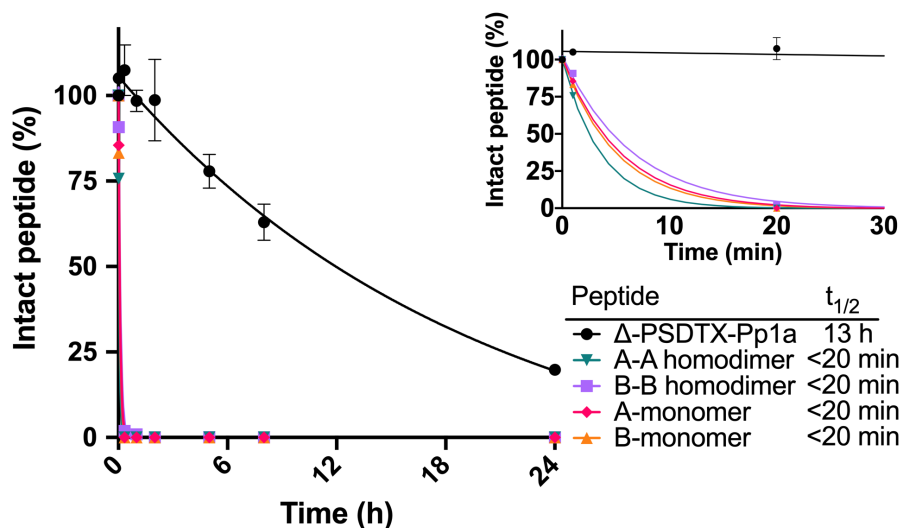

238  
239 **Fig. 6 Proteolytic stability of synthetic  $\Delta$ -PSD<sub>TX</sub>-Pp1a, AA-homodimer, BB-homodimer, A-**  
240 **monomer and B-monomer.** Fraction of intact peptide after incubation with proteinase K (1:200  
241 proteinase K:peptide molar ratio) at pH 7.5 and  $37^\circ\text{C}$  for up to 24 h (inset shows the first 30 min). As a  
242 negative control, peptides were incubated for 24 h under the same conditions without proteinase K.  
243 Peptide values were quantified relative to the negative control at  $t=0$ h. N = 2 for synthetic  $\Delta$ -PSD<sub>TX</sub>-

244 Pp1a for A-monomer, B-monomer, and AA-homodimer, N = 1 for BB-homodimer. Experiments were  
245 performed in duplicate. Data analysis and half-life ( $t_{1/2}$ ) calculation was performed using a non-linear fit  
246 one-phase decay model using Prism Version 8. Note the  $t=24$  h error bars of  $\Delta$ -PSDTX-Pp1a  
247 are smaller than the symbol.

248

## 249 Discussion

250 Ant species that inhabit plants (myrmecophytes) in an obligatory mutualism use a defensive  
251 venom to protect the host against defoliating insects and browsing mammals. Consequently, their  
252 venom has evolved toxins that trigger pain in vertebrates and paralyse/kill large arthropods (e.g.,  
253 caterpillars, grasshoppers). Previous investigations conducted on two other plant-ant venoms (i.e., *P.*  
254 *triplarinus* and *Tetraoponera aethiops*) revealed the presence of uncharacterized disulfide-linked dimeric  
255 peptides, suggesting that this class of toxin may have been retained in *Pseudomyrmecinae* because it  
256 participates in host plant protection [19,20]. Dimeric peptides have rarely been reported in venom  
257 peptidomes, with only a few examples in snake [21,22], scorpion [23], spider [24] and cone snail [25]  
258 venoms. Despite the fact that only a few studies have examined ant venom peptidomes, a total of 22  
259 homo- and heterodimeric peptides have been identified from the venoms of the ant subfamilies  
260 Ectatomminae [26], Myrmeciinae [17,27], Pseudomyrmecinae [19,20] and Ponerinae [28], indicating  
261 that these structurally more complex peptides play an important role in ant venom. From an evolutionary  
262 perspective, the presence of dimeric peptides within the venom of these four ant subfamilies is also  
263 highly interesting since they constitute a non-monophyletic group [29], leading to the question on what  
264 are the evolutionary advantages of these dimeric toxins compared to monomeric toxins?

265 We thus set out to study the venom of *P. penetrator*, a plant-ant species that strictly uses its  
266 venom to defend the host tree [10] and revealed that the most cytotoxic component of the whole venom  
267 was  $\Delta$ -PSDTX-Pp1a, a novel antiparallel heterodimer peptide. We then chemically synthesized  $\Delta$ -  
268 PSDTX-Pp1a along with its homodimeric and monomeric analogues to provide an in-depth  
269 characterization of this toxin in terms of function, structure, stability and potential applications.

270

## 271 **Insecticidal activity**

272  $\Delta$ -PSDTX-Pp1a is a fast-acting insecticidal peptide which caused immediate paralysis when  
273 injected into blowflies leading to death within 24 h. Compared to monomeric venom peptides of other  
274 ant species,  $\Delta$ -PSDTX-Pp1a with a LD<sub>50</sub> (at 24 h) of 3.0 nmol/g was more lethal than the most potent  
275 insecticidal venom peptide from *Manica rubida* (LD<sub>50</sub> at 24 h = 75.45 nmol/g for U<sub>20</sub>-MYRTX-Mri1a,  
276 tested in *Lucilia caesar*) [30] and from *Neoponera goeldii* (LD<sub>50</sub> at 24 h = 25.7 nmol/g for ponericin G1,  
277 tested in *Acheta domesticus*) [31]. To date, most of the insecticidal bioassays conducted on ant venoms  
278 revealed that the lethality of peptides is relatively weak since most exhibit non-lethal paralytic effects  
279 which are often reversible [8, 17, 30]. For instance, PONTX-Ae1a toxin isolated from the venom of the  
280 predatory ant *Anochetus emarginatus* [8] displayed similar paralytic activity to  $\Delta$ -PSDTX-Pp1a on  
281 blowflies (PD<sub>50</sub> at 1 h = 2.4 nmol/g for  $\Delta$ -PSDTX-Pp1a and PD<sub>50</sub> at 1 h = 8.9 nmol/g for PONTX-Ae1a),  
282 but this activity was completely reversible at all doses. The high lethality observed for  $\Delta$ -PSDTX-Pp1a  
283 could be advantageous regarding the non-predatory behaviour of *P. penetrator* that uses its venom for  
284 long-term protection of the host-plant while predatory ants store living paralysed prey in their nest before  
285 consumption [32,33]. In a broader context, the insecticidal potency of  $\Delta$ -PSDTX-Pp1a is about an order  
286 of magnitude less potent than the most spider-venom peptides that have been tested in the same blowfly  
287 toxicity assay [34,35,36].

288 Our structure-function relationship studies support a functional gain in lethality with dimerization,  
289 in comparison to the monomeric A- and B-chains that are only weakly active, which aligns well with a  
290 recent study on heterodimeric ant venom peptide Mp1a from *Ectatomma tuberculatum* ant [37] and a  
291 study on homotarsinin, a homodimeric peptide isolated from skin secretions of *Phyllomedusa tarsius*  
292 [38].

293

## 294 **Stability**

295  $\Delta$ -PSDTX-Pp1a has exceptional proteolytic and thermal stability (**Fig 6, S8**). The proteolytic  
296 stability of the heterodimer ( $t_{1/2}$  = 13 h) depends directly on its evolutionarily derived secondary structure  
297 considering that the sequence holds 24 potential proteinase K cleavage sites and that the parallel

298 homodimers were degraded 39-fold more quickly ( $t_{1/2} < 20$  min). The interplay between  $\alpha$ -helical  
299 conformation, disulfide bonds and interfacial hydrophobic interactions of dimeric peptides can be crucial  
300 components for high proteolytic stability [42]. Distinctin, for example, a heterodimeric pore-forming  
301 peptide found in skin secretions of the frog *Phyllomedusa distincta*, is also resistant to proteolysis [39,  
302 40]. In water, distinctin forms a non-covalent four- $\alpha$ -helix bundle having a positively charged surface and  
303 a hydrophobic core [41]. Such non-covalent structural arrangements could also be at play with  $\Delta$ -  
304 PSDTX-Pp1a.

305         There are several other structural features that have evolved in toxins to convey metabolic  
306 stability, which is important in order to effectively reach the site of action, which is often the central  
307 nervous system of animals. The inhibitor cystine knot (ICK) fold, for example, is widely found in venom  
308 peptides [43] and imparts peptides with remarkable stability against proteases [44]. Another robust  
309 peptide fold that imparts high protease and thermal stability is the helical arthropod-neuropeptide-  
310 derived (HAND) scaffold found in some spider and centipede venoms [45]. It is now well established  
311 that several ants use linear and polycationic monomeric peptides to paralyze their prey, and that these  
312 peptides are generally inherently unstable and susceptible to proteolytic degradation [46,47,48].  
313 Enzymatic stability is particularly important for venom peptides that have to be injected into a  
314 prey/predator and find their *in vivo* target; thus, proteolytic stability could have been a natural selection  
315 criterion that promoted the evolution of highly stable dimeric membrane-active peptides in ant venoms.  
316

### 317 **Homology, function and molecular target of $\Delta$ -PSDTX-Pp1a**

318         The A and B chains of  $\Delta$ -PSDTX-Pp1a have considerable sequence identity, differing only in  
319 their N-terminal region (extension in B chain) or C-terminal region (extensions of 2 and 4 residues)  
320 (**Fig. 7**). This high homology suggests that they are encoded by duplicated genes. Compared to other  
321 dimeric venom peptides from ants,  $\Delta$ -PSDTX-Pp1a chains have some sequence homology with the  
322 chains of six pseudomyrmecitoxins isolated from the venom of the plant-ant species *P. triplarinus* (31–  
323 36% identity and 55–59% similarity) (**Fig. 7**).

324

| Toxin      | Chain | Sequence                                                              | % ID | % S | Species               |
|------------|-------|-----------------------------------------------------------------------|------|-----|-----------------------|
| PSDTX-Pp1a | B     | I D P L --- T I L K I L K G G L K S I C K H R K Y L D K A C A S I G Q | 100  | 100 | <i>P. penetrator</i>  |
| PSDTX-Pp1a | A     | -----K P N I L K G G L K S I C K H R K Y L D K A C A A I ---          | 85   | 89  | <i>P. penetrator</i>  |
| PSDTX-Pt1a | A     | L F G --- G L L D K L R E K I K K Y C N - K E N L D K A C S K I ---   | 34   | 59  | <i>P. triplarinus</i> |
| PSDTX-Pt1a | B     | I S L A Q I K K L L Q I I K Q G L K A I C D N R D L I A K G C Q A --- | 36   | 58  | <i>P. triplarinus</i> |
| PSDTX-Pt1e | A     | L F G --- G L L D K L R E K I K K Y C N - K E N L D K A C S K I ---   | 31   | 59  | <i>P. triplarinus</i> |
| PSDTX-Pt1e | B     | L S L G T I K K L L Q I I A Q G L K A I C N H R D L I A K G C Q A --- | 36   | 55  | <i>P. triplarinus</i> |
| PSDTX-Pt1f | A     | L F G --- N I I D K L R E K I K K Y C N - K E N L D K A C S K I ---   | 31   | 59  | <i>P. triplarinus</i> |

325  
326 **Fig. 7 Multiple sequence alignment of subunit chains belonging to dimeric**  
327 **pseudomyrmecitoxins.** Gaps were introduced to optimise the alignment. Resulting alignments using  
328 the T-coffee alignment program were edited with BOXSHADE 3.3.1-9. Identical residues are highlighted  
329 in black while similar residues are highlighted in grey. Both percentage identity (% ID) and percentage  
330 similarity (% S) are relative to  $\Delta$ -PSDTX-Pp1a chain B sequenced in this study.

331 These pseudomyrmecitoxins are heterodimeric polypeptides associated with the anti-  
332 inflammatory activity observed in *P. triplarinus* venom [20]. There is no significant sequence homology  
333 between  $\Delta$ -PSDTX-Pp1a and the pseudomyrmecitoxins described in *T. aethiops* as for the other dimeric  
334 peptides from ant venoms. However, the predicted 3D structure of  $\Delta$ -PSDTX-Pp1a aligns well with the  
335 3D structures of two dimeric ant venom peptides, ectatotoxin Et1a (formerly ectatomin) from *Ectatomma*  
336 *tuberculatum* and myrmeciitoxin Mp1a (formerly pilosulin 2) from *Myrmecia pilosula* [17,49]. Indeed,  
337 despite very distinctive amino acid sequences compared to  $\Delta$ -PSDTX-Pp1a, the structures of these  
338 toxins are dominated by  $\alpha$ -helices stabilized by two or three disulfide bonds [17,49]. All of the dimeric  
339 peptides described in ant venoms share several physicochemical properties including a net positive  
340 charge (+4 to +18) due to a high lysine content, a substantial proportion of hydrophobic residues (>40%)  
341 and a mass of 5–9 kDa. These features are also shared with membrane-active peptides from ant venom  
342 that display insecticidal, cytotoxic and antimicrobial activities. Cell membranes are the common  
343 molecular target of linear, polycationic and amphiphilic ant-venom peptides [17,31,46,50]. Among ant  
344 venoms, the biological activity and the molecular target have been described for very few dimeric  
345 peptides. Nevertheless, Et1a and Mp1a, are pore-forming peptides that induce the formation of  
346 nonselective cationic channels in cell membranes, increasing cell permeability with resultant ion leakage  
347 and finally cell death [17, 51]. Similar interactions with lipid bilayers were also observed with the

348 homodimeric MIITX<sub>1</sub>-Mg2a peptide isolated from the venom of *Myrmecia gulosa*, which produces pain  
349 in vertebrates *via* the formation of pores in the membranes of peripheral sensory neurons [17]. Thus,  
350 taken together, the data suggest that the cytotoxic activity of  $\Delta$ -PSDTX-Pp1a is due membrane pore  
351 formation.

352

353 In conclusion,  $\Delta$ -Pseudomyrmecitoxin-Pp1a from the venom of *P. penetrator* is a potent cytotoxic  
354 and insecticidal heterodimeric peptide that has higher potency and proteolytic stability than its  
355 homodimeric and monomeric counterparts, suggesting an evolutionary advantage. This study further  
356 supports that venoms of ants (Formicidae) are a promising but underexplored source of chemically  
357 diverse bioactive peptides. Particularly, the presence of such structurally complex and highly stable  
358 heterodimers, which seems to be more common in ant venoms than in other animal venoms, highlights  
359 ant venom as an attractive biosource for interesting new ligands with applications as bioinsecticides or  
360 therapeutic leads, where stability towards abiotic (pH, light, water content) and biotic (enzymes,  
361 microorganisms) conditions are desired.

362

## 363 **Materials and Methods**

### 364 **Venoms collection**

365 Live *P. penetrator* workers (N = 600) were collected on La Montagne des Singes (5°04'20"N;  
366 52°41'43"W) in French Guiana. We used pruning scissors to cut up *Tachigali* aff. *paniculata* compound  
367 leaves containing parts of *P. penetrator* colonies and placed them in plastic bags. The boxes and plastic  
368 bags containing the colonies were immediately transported to the laboratory where workers were  
369 separated and sacrificed by freezing. Ant venom reservoirs were dissected and pooled in 10% v/v  
370 acetonitrile (ACN)/ distilled water (v/v) (see protocol in [11]). Briefly, samples were centrifugated for  
371 5 min at 12,000 g, then the supernatant was collected and lyophilized prior to storage at -20°C. A total  
372 of 608 dissected venom sacs were used for venom fractionation, isolation and sequencing of  $\Delta$ -PSDTX-  
373 Pp1a as well as for the cytotoxicity assays.

374

## 375 **Cytotoxic bioassays**

376 *Aedes albopictus* cells C6/36 were kindly provided by the Virology Unit of the Pasteur Institute of French  
377 Guiana. Each well of a 96-well plate was filled with 100  $\mu\text{L}$  of insect-cell suspension (age 1 week,  
378 concentration  $10^5$ – $10^7$  cells/mL) and the plate was incubated for 24 h at 28°C. After incubation, the  
379 supernatant was removed and replaced with 50  $\mu\text{L}$  of L15 Leibovitz culture media (negative control),  
380 cypermethrin (a synthetic pyrethroid) at 300, 100 and 50  $\mu\text{g}/\text{mL}$  (positive controls), or venom fractions.  
381 These fractions were prepared with lyophilized crude venom to obtain final concentrations of 50 to  
382 0.0005  $\mu\text{g}/\text{mL}$  in L15 Leibovitz culture media. Plates were incubated then for another 24 h at 28°C. After  
383 incubation, 5  $\mu\text{L}$  of the tetrazolium dye 3-(4,5-dimethylthiazol-2-yl)-2,5-diphenyltetrazolium bromide  
384 (MTT, 5 mg/mL) was added to each well and the plate was incubated for 1 h at 28°C in darkness. The  
385 supernatants were removed and 50  $\mu\text{L}$  of DMSO was added to each well to suspend the formazan  
386 crystals that had formed in the cells. After homogenisation by pipetting, absorbance was measured at  
387 570 nm. Cytotoxic effects were determined by comparing the percentage of living cells treated with the  
388 extract with the percentage of living cells treated only with the L15 Leibovitz culture media without venom  
389 fractions or cypermethrin. The following formula was used: mortality rate = absorbance of the negative  
390 control – (absorbance of the sample/absorbance of the negative control)  $\times 100$ . Inhibition concentrations  
391 ( $\text{IC}_{50}$  and  $\text{IC}_{99}$ ) and their 95% confidence intervals were calculated for six technical replicates (in three  
392 independent experiments) per concentration with logistic regression *via* probit analysis [52-55].

393

## 394 **Quantification of intracellular calcium, sodium and chloride ions**

395 Intracellular  $\text{Na}^+$ ,  $\text{Ca}^{2+}$  and  $\text{Cl}^-$  concentrations were determined using the cell-permeant ion-specific  
396 fluorescent dyes Corona Green Sodium Indicator, Oregon Green 488 BAPTA-1 and MQAE,  
397 respectively. All assays were performed using fluorescence-activated cell sorting (FACS) and analyzed  
398 with Cell Quest Pro software. Each concentration was tested using six technical replicates (in four  
399 independent experiments). Each well of a 24-well plate was filled with 720  $\mu\text{L}$  of *A. albopictus* cells  
400 C6/36 suspension (age 1 week, concentration  $10^5$ – $10^7$  cells/mL) and the plate was incubated for 24 h  
401 at 28°C. After incubation, the supernatant was removed and 1 mL of the crude venom, solubilized in



402 L15 Leibovitz culture media, was added to obtain final concentrations of 0.03, 0.3 and 3  $\mu\text{g/mL}$ . L15  
403 Leibovitz culture media without venom was used as negative control. After 24 h at 28°C, the supernatant  
404 was removed. For  $\text{Ca}^{2+}$ , 250  $\mu\text{L}$  of PBS with 63  $\mu\text{L}$  of Oregon green at 40  $\mu\text{M}$  was added. The plate was  
405 then incubated for 60 min at 25°C in the dark. For  $\text{Cl}^-$ , 500  $\mu\text{L}$  of hypotonic MQAE solution at 5 mM was  
406 added. The plate was then incubated for 15 min at 37°C in the dark. For  $\text{Na}^+$ , 500  $\mu\text{L}$  of Corona Green  
407 at 10  $\mu\text{M}$  was added. The plate was then incubated for 45 min at 28°C in the dark. For all treatments,  
408 cells were washed to remove excess probes and then resuspended in 2 mL of PBS before FACS reading  
409 according to the manufacturer's instructions (Life Technologies) [56-59]. Non-parametric analyses were  
410 performed for six technical replicates (four independent experiments) per concentration using the  
411 Kruskal-Wallis test and multiple comparisons were performed with the Dunn method [49,53].

412

#### 413 **RP-HPLC fractionation and peptide purification**

414 *P. penetrator* venom (11 mg) was fractionated *via* RP-HPLC using a semi-preparative- $\text{C}_{18}$  Jupiter Proteo  
415 column (4 $\mu\text{m}$ , 10 x 250 mm) with a gradient comprised of solvent A [water/0.1 % (v/v) TFA] and solvent  
416 B [ACN /0.1% (v/v) TFA]. The gradient of solvent B was as follows: 5% for 7 min, 5–95% over 65 min,  
417 and 95% over 8 min at a flow rate of 3.5 mL/min. The eluate was monitored by UV absorbance at 214  
418 nm using a diode-array detector. All analyses were performed on a Shimadzu LC-20AD system. 64  
419 fractions of 3.5 mL were collected automatically every 1.4% of the gradient (every minute), lyophilized  
420 and stored at -20°C. Further purification of the most cytotoxic fractions was achieved by subjecting the  
421  $\text{C}_{18}$  fractions to a second purification step using cation exchange chromatography on a TOSOH  
422 Bioscience column (TSK gel SP-STAT, 7  $\mu\text{m}$ , 4.6 mm ID x 10 cm L, TOSOH Bioscience, Germany) with  
423 solvent A [200 mM sodium acetate, pH 4.6] and solvent B [200 mM sodium acetate, pH 4.6, 1 M sodium  
424 chloride]. The gradient of solvent B was as follows: 0% for 3 min, 0–100% over 20 min, and 100% over  
425 8 min at a flow rate of 1 mL/min. The eluate was monitored by UV absorbance at 214 nm using a diode-  
426 array detector. All analyses were performed on a Shimadzu LC-20AD system. Fractions collection was  
427 based on time, every 0.5 min between 0.5 and 29.5 min (starting at 0% for 2.5 min and then the gradient  
428 itself). Major peaks were desalted by RP-HPLC using an Ascentis  $\text{C}_{18}$  column (3  $\mu\text{m}$ , 4.6mm ID x 15 cm,

429 Sigma-Merck, Germany) using peak-based collection (slope). Sub-fractions were lyophilized for further  
430 cytotoxicity assays. The content of each HPLC fraction was analysed using MS as described in **Table**  
431 **S1**.

### 432 433 **Purification and characterization of the heterodimer and sequencing**

434 Reduction of  $\Delta$ -PSDTX-Pp1a heterodimer was performed by treating 65  $\mu$ g of the compound in 100 mM  
435 (50  $\mu$ L) of ammonium bicarbonate buffer pH 8.5 with 40 mM tris(2-carboxyethyl)phosphine (TCEP) for  
436 1 h at 55 °C (volume of 50  $\mu$ L), and reaction progress was monitored by MS. Monomers were then  
437 alkylated with 70 mM iodoacetamide for 1 h in the dark at 25 °C before adding 240 mM dithiothreitol  
438 (final concentration). Finally, the sample was purified *via* RP-HPLC using an Agilent AdvanceBio peptide  
439 map column (2.1  $\times$  250 mm) at a flow rate of 0.4 mL/min with solvent A [water/0.1% TFA (v/v)] and  
440 solvent B [ACN/0.1% TFA (v/v)]. The gradient of solvent B was as follows: 5% for 3 min, 5–15% over  
441 1 min, 15–65% over 25 min, 95% over 4 min. The monomers were collected on Agilent 1260 HPLC  
442 (Agilent Technologies) using peak-based collection (by slope), then lyophilized. Carbamidomethyl  
443 derivatives of the monomers were digested in 100 mM of ammonium bicarbonate buffer pH 8.5 with  
444 chymotrypsin or Lys-C, at a protein:enzyme ratio of 10:1, for 8 h at 37 °C and further submitted to MS  
445 analysis.

### 446 447 **Determination of disulfide bond connectivity**

448 The disulfide framework of the heterodimer was determined by digesting the compound with trypsin (in  
449 100 mM of ammonium bicarbonate buffer pH 8.5 with trypsin at a protein:enzyme ratio of 10:1) in the  
450 presence of the oxidizing reagent cystamine to narrow scrambling effects usually observed in alkaline  
451 conditions, and therefore to maintain the native configuration.

452 The antiparallel form, C14(PS1)-C28(PS2) and C24(PS1)-C18(PS2), was detected by MS through the  
453 detection of tryptic fragments A and B with masses of 893.4 Da and 1095.5 Da, respectively (data not  
454 shown). In contrast, the parallel configuration, C14(PS1)-C18(PS2) and C24(PS1)-C28(PS2), could be  
455 inferred from the observation of tryptic fragments C and D, 896.4 Da and 1092.5 Da, respectively.

456 Experimentally, Cys-containing peptides A and B were observed as predominant signals suggesting  
457 that the heterodimer was mainly in the antiparallel form with a connectivity of C14(PS1)-C28(PS2) and  
458 C24(PS1)-C18(PS2). However, the detection of fragment C by LC-MS, while minor, indicates that the  
459 parallel form may also be present. The further addition of cystamine results in an increase of the  
460 fragments A and B from the anti-parallel form in MS analyses, indicating that the parallel form could  
461 possibly result from an artefactual recombination of the disulfide bridges (data not shown). However,  
462 this cannot be concluded definitively.

463

464

## 465 **Mass spectrometry**

466 A Waters Q-TOF Xevo G2S mass spectrometer equipped with an Acquity UHPLC system and  
467 Lockspray source was used for acquisition of LC-ESI/MS and LC-ESI/MS/MS data. The dimer analysis  
468 was made by injection of 100 pmol onto the column using a 1.7  $\mu\text{m}$  Acquity UPLC BEH (2.1  $\times$  150 mm)  
469 column (Waters) at a flow rate of 0.8 mL/min with solvent A [water/0.1% formic acid (FA) (v/v)] and  
470 solvent B ACN/0.1% FA (v/v)]. The dimer was eluted using the following gradient of solvent B: 5–10%  
471 over 0.2 min, 10–70 % over 1.3 min, 70–90% over 0.1 min. Separation of monomers digests was  
472 performed using a 1.7  $\mu\text{m}$  Acquity UPLC BEH300 column (Waters, 2.1  $\times$  50 mm) at a flow rate of  
473 0.4 mL/min with solvent A [water/0.1% FA (v/v)] and solvent B [ACN/0.1% FA (v/v)]. Injections of 150  
474 mol of the monomer digests were made onto the column. Peptides were eluted using the following  
475 gradient of solvent B: 2% over 12 min, 2–10% over 1.2 min, 10–70% over 8 min, 70–90% over 0.6 min  
476 and 90% over 5.4 min. Mass spectrometer settings for MS analyses were a capillary voltage of 0.5 kV  
477 and a cone voltage of 40 V. The mass spectra were recorded over a scan range of 100–2000 Da. MS  
478 data were acquired using a data-dependent acquisition method (DDA) for which MS/MS data were  
479 acquired using collision energies based on mass and charge state of the candidate ions. For calibration,  
480 an external lock mass was used with a separate reference spray (LockSpray) using a solution of leucin  
481 enkephalin eluted at a flow rate of 5  $\mu\text{L}/\text{min}$ . The calibration was based on the detection in MS of ions  
482  $m/z$  278.1141 and 556.2771 at a collision energy of 23 eV. LC/MS and LC-ESI/MS/MS data analyses  
483 were performed using MassLynx version 4.1 (Waters) software supplied by the manufacturer. The  
484 resulting MS/MS spectra data were analysed to provide *de novo* sequencing information using PEAKS®  
485 studio version 5.2 software (Bioinformatics Solutions Inc.) with the following settings: chymotrypsin or  
486 Lys-C enzyme and carbamidomethylation (C) as fixed modifications, and C-terminal amidation as  
487 variable; mass accuracy on fragment ions at 0.1 Da; mass accuracy for the precursor mass at 10 ppm.  
488 The identification of peptides was further manually validated using MS/MS spectra.

489

490

## 491 **Edman degradation**

492 Purified peptides were subjected to Edman degradation on a gas-phase sequencer model ABI 492  
493 (Applied Biosystems, CA, USA). The phenylthiohydantoin (PTH) amino acid derivatives generated at  
494 each sequence cycle were identified and quantified on-line with an Applied Biosystems Model 140C  
495 HPLC system using the Applied Biosystems Model 610 A data analysis system for protein sequencing.  
496 The PTH-amino acid standard kit was used and reconstituted according to the manufacturer's  
497 instructions. The procedures and reagents were used as recommended by the manufacturer.

498

## 499 **Chemical synthesis and purification of peptides**

500 Fmoc amino acids were purchased from Iris Biotech GmbH (Marktredwitz, Germany). Fmoc-Gln(Trt)-  
501 Wang resin (loading 0.29 mmol/g) and Fmoc-Rink-ProTide resin (loading 0.19 mmol/g) were purchased  
502 from CEM Corporation (NC, USA). Fmoc-S-acetamidomethyle-L-cysteine (Fmoc-L-Cys(Acm)-OH) was  
503 purchased from Chem-Impex International. ACN was from Merck (Bayswater, Australia). *N,N*-  
504 dimethylformamide (DMF), TFA and diethyl ether were from Chem-Supply (Gillman, Australia). All  
505 solvents were of the highest available purity and used without further purification. All other reagents and  
506 solvents were obtained from Sigma-Aldrich (Sydney, NSW, Australia) in the highest available purity.  
507 Analytical RP-HPLC was performed on a Shimadzu LC-20AT system with a Kromasil Classic LC-MS  
508 C<sub>18</sub> column (100 Å, 3.5 µm, 150 mm x 2.1 mm). Preparative HPLC was performed on a Vydac Protein  
509 and Peptide C<sub>18</sub> preparative column and crude and fractions analysed using RP-HPLC (Shimadzu LC-  
510 20AT system) and ESI-MS. Mass analysis of the final products were performed on an API Q-star Pulsar  
511 Q-TOF mass spectrometer (PE SCIEX, Canada) with a Series 1100 solvent delivery system equipped  
512 with an auto-injector (Agilent Technologies Inc., Palo Alto, CA) and a Kromasil Classic LC-MS C<sub>18</sub>  
513 column (100 Å, 3.5 µm, 150 mm x 2.1 mm). Data acquisition and processing were carried out using  
514 Analyst QS software v1.1 (PE SCIEX, Canada).

515 The Cys(Acm) protected A- and B-chain peptides used to make synthetic Δ-PSDTX-Pp1a and the  
516 parallel A-A homodimer were assembled using Fmoc-SPPS on a CEM Liberty Prime microwave peptide  
517 synthesiser. The A-chain with its C-terminal amide was synthesized on an Fmoc-Rink-ProTide resin

518 (scale 0.1 mmol). The B-chain with its C-terminal acid was synthesized on a preloaded Fmoc-Gln(Trt)-  
519 Wang resin (scale 0.1 mmol). Directed disulfide-bond formation was achieved using Ac<sub>m</sub>-protected  
520 cysteine building blocks, where Cys1 on the A-chain and Cys2 on the B-chain were protected with Ac<sub>m</sub>.  
521 Prior to the first amino acid coupling, the Fmoc group was removed *via* treatment with 25%  
522 pyrrolidine/DMF at 105 °C for 40 s. The resin was washed with DMF (2x 4 mL). Amino acid activation  
523 and couplings were carried out in DMF using Fmoc-amino acid/carbodiimide (DIC)/Oxyma (5:10:5  
524 equivalents of resin loading) at 105 °C for 1 min. The cycle of deprotection, washing and coupling was  
525 repeated until the full-length peptide was obtained after which the resin was washed with DCM (3x) and  
526 drained. The peptide was cleaved from the resin and the side chain protecting groups (except for Ac<sub>m</sub>)  
527 were removed by treatment with 15 mL TFA: water: ethanedithiol: triisopropylsilane (92.5:2.5:2.5:2.5) for  
528 40 min at 42 °C after which the cleavage solution was drained. The crude peptide was precipitated with  
529 30 mL cold diethyl ether, centrifuged and the supernatant discarded (repeated 3x) and redissolved in  
530 50% ACN / 0.043% TFA in water and lyophilised. The crude peptide was purified by preparative RP-  
531 HPLC and identity confirmed using analytical RP-HPLC and ESI-Q/MS. In total, 30.1 mg A chain and  
532 61.8 mg B chain was obtained (>90% purity) with a yield of 15% and 62%, respectively.

533 The Cys(Ac<sub>m</sub>)-protected B chain used to make the parallel B-B homodimer was synthesized using  
534 standard Fmoc-SPPS on a Symphony (Protein Technologies Inc.) automated synthesizer using Fmoc-  
535 Gln(Trt)-Wang resin (scale 0.1 mmol). Prior to first amino acid coupling, the Fmoc group was removed  
536 *via* treatment with 30% piperidine in DMF (1 x 1.5 min and 1 x 4 min) and subsequently washed with  
537 DMF. Amino acids were coupled with 0.2 M (O-(6-Chlorobenzotriazol-1-yl)-N,N,N',N'-  
538 tetramethyluronium hexafluorophosphate (HCTU) in DMF and N,N-diisopropylethylamine (DIEA) using  
539 5-fold excess relative to resin loading (1 x 5 min then 1 x 10 min). The cycle of deprotection, washing  
540 and coupling was repeated until the full-length peptide was obtained after which the resin was washed  
541 with DCM (3x) and drained. Peptides were cleaved off the resin and side chain protecting groups were  
542 removed by treatment with TFA: water: ethanedithiol: triisopropylsilane (90:5:2.5:2.5) for 2 h at 25° C.  
543 Following removal of most of the cleavage solvent under a stream of nitrogen, the crude peptide was  
544 precipitated with 30 mL cold diethyl ether, then the precipitate was washed with cold diethyl ether,

545 redissolved in 50% ACN / 0.043% TFA in water, and lyophilised. The crude peptide was purified by  
546 preparative RP-HPLC and identity confirmed using analytical RP-HPLC and ESI-Q/MS. In total, 18.7  
547 mg B chain was obtained (>90% purity) with a yield of 9%.

548

#### 549 **Oxidative folding**

550 Cys(Acm)-protected A-chain and B-chain peptide stock were diluted to 0.5 mM in a  $\text{NH}_4\text{HCO}_3$  0.1 M  
551 solution (pH ~ 8.0) in a 1:1.5 ratio (A-chain: B-chain) and stirred at 25 °C for 48 h to form the first disulfide  
552 bond. The reaction was monitored by analytical RP-HPLC and disulfide-bond formation confirmed by  
553 ESI-MS. Three major products were obtained: the A-B chain heterodimer, A-A homodimer and B-B  
554 homodimer, all with the Cys(Acm) protecting groups intact. The oxidative mixture was purified using  
555 preparative RP-HPLC and lyophilized.

556 The A-B chain heterodimer with the Cys(Acm) intact was diluted to 0.1 mM in 80% aqueous MeOH  
557 0.1 M HCl solution to form the second disulfide bond. Fifty equivalents of  $\text{I}_2$  dissolved in 100% MeOH  
558 was added and the solution was stirred at 25°C for 10–20 min until the reaction was complete. The B-B  
559 homodimer second disulfide bond was formed using the same method as the A-B heterodimer. The A-  
560 A homodimer with the Cys(Acm) intact was diluted to 0.1 mM in 50% aqueous AcOH 2 M GnHCl solution  
561 then 50 equivalents of  $\text{I}_2$  dissolved in 50% aqueous AcOH was added and the solution was stirred at  
562 25°C until the reaction was complete. The reactions were monitored by LC-MS. Once completed, 1 M  
563 ascorbic acid in water was added until the solution was clear. The solution was diluted 10 times with  
564 0.043% TFA in water and the final peptide product was isolated by RP-HPLC, identity confirmed by MS  
565 and lyophilised. In total, 9.4 mg synthetic  $\Delta$ -PSDTX-Pp1a (100% purity), 1.8 mg parallel A-A homodimer  
566 (97% purity), and 0.9 mg parallel B-B homodimer (92% purity) were obtained (**Table S7**).

567 Reduced linear unprotected A- and B-chain peptides were synthesized, purified and analysed using the  
568 same method as described for the Cys(Acm)-protected A- and B-chains. 3 mg linear A-chain and 5.5  
569 mg linear B-chain were obtained (>95% purity) with yields of 1% and 6%, respectively (**Table S7**).

570

571



572 **RP-HPLC co-elution study of synthetic  $\Delta$ -PSDTX-Pp1a and native  $\Delta$ -PSDTX-Pp1a**

573 RP-HPLC was performed using a Shimadzu LC-20AT system and a Kromasil Classic LC-MS C<sub>18</sub> column  
574 (100 Å, 3.5 µm, 150 mm x 2.1 mm). Solvents for RP-HPLC consisted of 0.043% TFA/ water (solvent A)  
575 and 0.043% TFA/ 90% ACN/ water (solvent B). ACN was from Merck (Bayswater, Australia). TFA was  
576 from Chem-Supply (Gillman, Australia).

577 The crude venom, native  $\Delta$ -PSDTX-Pp1a, and synthetic  $\Delta$ -PSDTX-Pp1a were run on analytical RP-  
578 HPLC using a gradient of 20–70% solvent B over 25 min, at a flow rate of 0.2 mL/min. 10 µL 1 mg/mL  
579 synthetic  $\Delta$ -PSDTX-Pp1a in ~15% ACN/ 0.043% TFA in water was injected. 40 µL crude venom in ~15%  
580 ACN/ 0.043 % TFA in water was injected. 80 µL native  $\Delta$ -PSDTX-Pp1a in ~15% ACN/ 0.043% TFA in  
581 water was injected.

582

583 **Molecular modelling**

584 Molecular models were produced using the *de novo* PEP-fold method [15] through the dedicated  
585 webserver (v.3.1 available at [http://mobylipe.rpbs.univ-paris-diderot.fr/cgi-bin/portal.py#forms::PEP-](http://mobylipe.rpbs.univ-paris-diderot.fr/cgi-bin/portal.py#forms::PEP-FOLD3)  
586 FOLD3), given the peptide sequences identified by MS. All structural models were submitted to  
587 molecular dynamics (MD) simulations using the Amber forcefield as implemented in Yasara [15].  
588 Peptides were simulated in a neutralized explicit water solvent box, under periodic boundary conditions  
589 and at a constant temperature of 25°C. MD trajectories of 40 ns were collected at 2 ps intervals for both  
590 molecular systems and the production period used for analysis was set after the MD simulation reach  
591 an equilibrated state (stable root mean square deviation). Clustering analysis upon trajectories provided  
592 the most representative structure later considered as the final structural models. Electrostatic potentials  
593 were computed by using the APBS program [62] and hydrophobic potentials were provided by the  
594 Platinum webserver (<http://model.nmr.ru/platinum/>, [63]).

595

596 **Circular dichroism analysis of  $\Delta$ -PSDTX-Pp1a**

597 Stock peptide solutions were prepared in 50% ACN/water at 1 mM concentration. Peptide  
598 concentrations for electronic circular dichroism (ECD) analysis were 50 µM in PBS buffer (pH 7.4). ECD

599 spectra were obtained on a Jasco J-810 spectropolarimeter (Easton, MD, USA). All experiments were  
600 carried out using a 0.1 cm quartz cell with 250  $\mu$ L sample volume at 25°C. Spectra were acquired in in  
601 far UV region (185–260 nm) using 20 nm/min scan speed, 1 nm bandwidth, and 0.5 nm data pitch with  
602 5 scans averaged for each sample. Blank subtraction was performed using Spectra Management  
603 Software followed by curve smoothing using the binomial method. Data were processed and displayed  
604 using Prism 7 (GraphPad, La Jolla USA).

605

### 606 **Proteolytic and thermal stability assays**

607 Samples were analysed *via* LC-MS using an API Q-Star Pulsar mass spectrometer (SCIEX, Ontario,  
608 Canada) with a Series 1100 solvent delivery system equipped with an auto-injector (Agilent  
609 Technologies Inc., Palo Alto, CA) using a Kromasil Classic LC-MS C<sub>18</sub> column (100 Å, 3.5  $\mu$ m, 150 mm  
610 x 2.1 mm). Data acquisition and processing were carried out using Analyst software v1.1 (SCIEX,  
611 Canada). Solvents for RP-HPLC consisted of 0.043% TFA/ water (Solvent A) and 0.043% TFA/ 90%  
612 ACN/ water (Solvent B).

613

### 614 **Proteolytic stability**

615 70  $\mu$ L of reaction buffer (0.2 M sodium phosphate, 1 mM CaCl<sub>2</sub> pH 7.5) was preheated to 37 °C for  
616 30 min. 20  $\mu$ L peptide stock solution (0.5 mM peptide in solvent A) and 10  $\mu$ L proteinase K stock solution  
617 (5  $\mu$ M in reaction buffer) were added to the reaction buffer and the mixture was incubated at 37 °C for  
618 24 h. Final peptide concentration was 100  $\mu$ M and final proteinase K concentration was 0.5  $\mu$ M (1:200  
619 proteinase K:peptide molar ratio). For the negative control, 10  $\mu$ L reaction buffer was added instead of  
620 proteinase K. 10  $\mu$ L aliquots were taken at 1 min, 20 min, 1 h, 2 h, 5 h, 8 h, and 24 h and quenched with  
621 35  $\mu$ L ice-cold extraction buffer (50% ACN, 0.1 M NaCl, 1% TFA) followed by centrifugation at 17,000 g  
622 for 10 min. The negative control was measured at 0 h and 24 h. Samples were stored at –30°C until  
623 they were analysed *via* LC-MS using a gradient of 20–90% solvent B over 25 min, at a flow rate of 0.2  
624 mL/min flow. N = 2 for synthetic  $\Delta$ -PSDTX-Pp1a A chain, B chain, and A-A homodimer, N = 1 for B-B  
625 homodimer (due to limited amounts of peptide). Each experiment was run in duplicate with a negative

626 control. Peptide values were quantified relative to the negative control at 0 h and data analysis was  
627 performed using a non-linear fit one-phase decay model in Prism Version 8 (GraphPad, La Jolla USA).

628

### 629 **Thermal stability**

630  $\Delta$ -PSDTX-Pp1a was incubated for 72 h at 37°C, 60°C, and 90°C. 48  $\mu$ L 0.05% TFA in water was  
631 preheated to 37°C, 60°C, or 90°C for 30 min. Once heated, 0.5 mM  $\Delta$ -PSDTX-Pp1a was diluted in the  
632 heated buffer to a final concentration of 100  $\mu$ M and a total reaction volume of 60  $\mu$ L. Time points were  
633 taken at 0 h, 24 h, 48 h, and 72 h and at each timepoint 10  $\mu$ L reaction solution was diluted in 35  $\mu$ L  
634 0.05% TFA in water and stored at -30°C until analysis *via* LC-MS using a gradient of 20–90% solvent  
635 B over 18 min, at a flow rate of 0.2 mL/min. Peptide values were quantified by ion extraction (ion range  
636 1100.6–1101.6 Da) using Analyst QS 1.1 software quantification wizard. N = 3 for each peptide.  
637 Experiments were run in triplicate and samples were quantified relative to t=0 h. Data analysis was  
638 performed using a non-linear fit one-phase decay model in Prism Version 8 (GraphPad, La Jolla USA).  
639 Y0 and Plateau were constrained to 100 and 0, respectively.

640

### 641 ***In vivo* insecticidal assays**

642 Insecticidal activity was evaluated injection of peptides into the ventro-lateral thoracic region of sheep  
643 blowflies (*Lucilia cuprina*; mass 22.4–31.7 mg) as previously described [60]. A 1.0 mL Terumo Insulin  
644 syringe (B-D Ultra-Fine, Terumo Medical Corporation, Maryland, USA) with a fixed 29 G needle fitted to  
645 an Arnold hand micro-applicator (Burkard Manufacturing Co. Ltd., England) was used for injection with  
646 a maximum volume of 2  $\mu$ L per fly. All flies were individually housed in 2 mL tubes and paralytic activity  
647 and lethality were determined at 0.5, 1 and 24 h post-injection. A total of three tests were performed  
648 with 4–6 doses per peptide (n = 10 flies per dose) and the corresponding controls (MilliQ water; n = 10–  
649 40 per peptide). PD<sub>50</sub> and LD<sub>50</sub> values were calculated as previously described [64]. Two-way ANOVA  
650 with Tukey's multiple post hoc test was performed in Prism 8 for statistical comparison of the insecticidal  
651 activity of different peptides. PD<sub>50</sub> and LD<sub>50</sub> values for the A- and B-chain monomers and homodimers  
652 were compared to the values of the heterodimeric  $\Delta$ -PSDTX-Pp1a (\* p<0.01; \*\* p<0.0001).

653

654 **Acknowledgments**

655 This work was supported by Investissement d’Avenir of the Agence National de la Recherche (CEBA:  
656 ANR-10-LABX-25-01). We are grateful to the Virology Unit and the Medical Entomology Unit of the  
657 Pasteur Institute of French Guiana for kindly providing *Aedes albopictus* cells and *Aedes aegypti* eggs  
658 and we like to thank Geoff Brown (Department of Agriculture and Fisheries, Queensland, Australia) for  
659 the supply of blowflies. M.M. was supported by the European Research Council under the European  
660 Union’s Horizon 2020 research and innovation program (714366), by the Australian Research Council  
661 (DP190101667), and by the Vienna Science and Technology Fund (WWTF; LS18-053). G.F.K. was  
662 supported by a Principal Research Fellowship (APP1136889) from the Australian National Health &  
663 Medical Research Council.

664

665 **Author contributions**

666 A.T., A.D., M.M. and C.D. conceived the study. A.T. collected and dissected ants. I.B. performed the  
667 cytotoxic and fluorometry bioassays. The peptide purification and MALDI-TOF MS/MS analysis was  
668 made by M.T., L.J. and data were analysed by L.J., M.D.W, R.B. and AT. Insecticidal assays were  
669 conducted by V. H. H.M. synthesized, purified synthetic peptides and performed the stability tests under  
670 the supervision of M.M. ECD spectra were generated by N.B.E. Structural modelling was performed by  
671 O.D and A.T. optimized the visualization. All authors discussed the results and contributed to the  
672 final manuscript.

673

674

675 **Conflicts of interest**

676 The authors declare no competing financial and non-financial competing interests.

677

678

679 **References**

- 680 1. Mayhew PJ (2007) Why are there so many insect species? Perspectives from fossils and phylogenies.  
681 Biol. Rev. 82:425–454. <https://doi.org/10.1111/j.1469-185X.2007.00018.x>
- 682 2. Van Emden, H.F. Subclass pterygota, division endopterygota, order Hymenoptera (Sawflies, Ants,  
683 Bees and Wasps) 120,000 described species. In Handbook of Agricultural Entomology; John Wiley &  
684 Sons: Oxford, UK, 2013; pp. 193–220.
- 685 3. Peters RS, Krogmann L, Mayer C, Donath A, Meusemann K, Kozlov A, Podsiadlowski L, Petersen  
686 M, Lanfear R, Diez PA, Heraty J, Kjer KM, Klopstein S, Meier R, Polidori C, Schmitt T, Liu S, Zhou X,  
687 Wappler T, Rust J, Misof B, Niehuis O (2017) Evolutionary History of the Hymenoptera. Curr. Biol.  
688 27:1013–1018. <https://doi.org/10.1016/j.cub.2017.01.027>
- 689 4. Touchard A, Aili SR, Fox EGP, Escoubas P, Orivel, J, Nicholson, G.M.; Dejean, A. The biochemical  
690 toxin arsenal from ant venoms. *Toxins* **2016**, 8, 30.
- 691 5. dos Santos-Pinto, J. R. A., Perez-Riverol, A., Lasa, A. M., & Palma, M. S. (2018). Diversity of peptidic  
692 and proteinaceous toxins from social Hymenoptera venoms. *Toxicon*, 148, 172-196.
- 693
- 694 6. Aili, S.R.; Touchard, A.; Escoubas, P.; Padula, M.P.; Orivel, J.; Dejean, A.; Nicholson, G.M.; Diversity  
695 of peptide toxins from stinging ant venoms. *Toxicon* **2016**, 92, 166–178.
- 696
- 697 7. Touchard, A.; Koh, J. M. S.; Aili, S. R.; Dejean, A.; Nicholson, G. M.; Orivel, J.; Escoubas, P., The  
698 complexity and structural diversity of ant venom peptidomes is revealed by mass spectrometry profiling.  
699 *Rapid Commun Mass Spectrum* **2015**, 29, 385-396.
- 700
- 701 8. Touchard, A.; Brust, A.; Cardoso, F. C.; Chin, Y. K. Y.; Herzig, V.; Jin, A.-H.; Dejean, A.; Alewood, P.  
702 F.; King, G. F.; Orivel, J.; Escoubas, P., Isolation and characterization of a structurally unique  $\beta$ -hairpin

703 venom peptide from the predatory ant *Anochetus emarginatus*. *Biochim Biophys Acta – General*  
704 *Subjects* **2016**, 1860 (11, Part A), 2553-2562.

705

706 9. Sanchez, A.; Bellota, E. Protection against herbivory in the mutualism between *Pseudomyrmex*  
707 *dendroicus* (Formicidae) and *Triplaris americana* (Polygonaceae). *J. Hymenopt. Res.* **2015**, 46, 71–83.

708

709 10. Dejean, A.; Labrière, N.; Touchard, A.; Petitclerc, F.; Roux, O. Nesting habits shape feeding  
710 preferences and predatory behavior in an ant genus. *Naturwissenschaften* **2014**, 101, 323–330.

711

712 11. Touchard, A.; Labriere, N.; Roux, O.; Petitclerc, F.; Orivel, J.; Escoubas, P.; Koh, J.M.; Nicholson,  
713 G.M.; Dejean, A. Venom toxicity and composition in three *Pseudomyrmex* ant species having different  
714 nesting modes. *Toxicon* **2014**, 88, 67–76.

715

716 12. Kraemer, M.U.G.; Reiner, R.C.; Brady, O.J. *et al.* Past and future spread of the arbovirus  
717 vectors *Aedes aegypti* and *Aedes albopictus*. *Nat. Microbiol.* **2019**, 4, 854–863.

718

719 13. King, G. F.; Gentz, M. C.; Escoubas, P.; Nicholson, G. M., A rational nomenclature for naming  
720 peptide toxins from spiders and other venomous animals. *Toxicon* **2008**, 52 (2), 264-276.

721

722 14. Lamiable, A.; Thévenet, P.; Rey, J.; Vavrusa, M.; Derreumaux, P.; Tufféry, P. PEP-FOLD3: faster d  
723 novo structure prediction for linear peptides in solution and in complex. *Nucleic Acids Res.* **2016**, 44,  
724 W449–54.

725

726 15. Krieger, E.; Darden, T.; Nabuurs, S.B.; Finkelstein, A.; Vriend, G. Making optimal use of empirical  
727 energy functions: force-field parameterization in crystal space. *Proteins* **2004**, 57, 678–683.

728

- 729 16. Robinson, S. D.; Mueller, A.; Clayton, D.; Starobova, H.; Hamilton, B. R.; Payne, R. J.; Vetter, I.;  
730 King, G. F.; Undheim, E. A. A comprehensive portrait of the venom of the giant red bull ant, *Myrmecia*  
731 *gulos*a, reveals a hyperdiverse hymenopteran toxin gene family. *Sci. Adv.* **2018**, *4*, eaau4640.  
732
- 733 17. Dekan, Z.; Headey, S.J.; Scanlon, M.; Baldo, B.A.; Lee, T.-Z.; Aguilar, M.-I.; Deuis, J.R.; Vetter, I.;  
734 Elliott, A.G.; Amado, M.; Cooper, M.A.; Alewood, D.; Alewood, P.F.  $\Delta$ -Myrtoxin-Mp1a is a helical  
735 heterodimer from the venom of the Jack Jumper ant with antimicrobial, membrane disrupting and  
736 nociceptive activities. *Angew. Chem. Int. Ed.* **2017**, *56*, 8495–8499.  
737
- 738 18. Guo, S.; Herzig, V.; King, G. F. Dipteran toxicity assays for determining the oral insecticidal activity  
739 of venoms and toxins. *Toxicon* **2018**, *150*, 297-303.  
740
- 741 19. Pan, J.; Hink, W.F. Isolation and characterization of myrmexins, six isoforms of venom proteins with  
742 anti-inflammatory activity from the tropical ant, *Pseudomyrmex triplarinus*. *Toxicon* **2000**, *38*, 1403–  
743 1413.  
744
- 745 20. Barassé, V.; Touchard, A.; Téné, N.; Tindo, M.; Kenne, M.; Klopp, C.; Dejean, A.; Bonnafé, E.;  
746 Treilhou, M. The peptide venom composition of the fierce stinging ant *Tetraponera aethiops*  
747 (Formicidae: Pseudomyrmecinae). *Toxins* **2019**, *11*, 732.  
748
- 749 21. Osipov, A.V.; Kasheverov, I.E.; Makarova, Y.V., Starkov V.G.; Vorontsova, O.V.; Ziganshin, R.;  
750 Andreeva, T.V.; Serebryakova, M.V.; Benoit, A.; Hogg, R.C.; Bertrand, D.; Tsetlin, V.I.; Utkin, Y.N.  
751 Naturally occurring disulfide-bound dimers of three-fingered toxins: a paradigm for biological activity  
752 diversification. *J. Biol. Chem.* **2008**, *283*, 14571–14580.  
753



- 754 22. Moiseeva, N.; Bau, R.; Swenson, S.D.; Markland, Jr., F.S.; Choe, J.Y.; Liu, Z.J.; Allaire, M. Structure  
755 of acostatin, a dimeric disintegrin from Southern copperhead (*Agkistrodon contortrix contortrix*), at 1.7  
756 Å resolution. *Acta Crystallogr. D. Biol. Crystallogr.* **2008**, *64*, 466–470.
- 757
- 758 23. Zamudio, F.Z.; Conde, R.; Arevalo, C.; Becerril, B.; Martin, B.M.; Valdivia, H.H.; Possani, L.D. The  
759 mechanism of inhibition of ryanodine receptor channels by imperatoxin I, a heterodimeric protein from  
760 the scorpion *Pandinus imperator*. *J. Biol. Chem.* **1997**, *272*, 11886–11894.
- 761
- 762 24. Santos, A.D.; Imperial, J.S.; Chaudhary, T.; Beavis, R.C.; Chait, B.T.; Hunsperger, J.P.; Olivera,  
763 B.M.; Adams, M.E.; Hillyard, D.R. Heterodimeric structure of the spider toxin  $\mu$ -agatoxin IA revealed by  
764 precursor analysis and mass spectrometry. *J. Biol. Chem.* **1992**, *267*, 20701–20705.
- 765
- 766 25. Loughnan, M.; Nicke, A.; Jones, A.; Schroeder, C.I.; Nevin, S.T.; Adams, D.J.; Alewood, P.F.; Lewis,  
767 R.J. Identification of a novel class of nicotinic receptor antagonists: dimeric conotoxins VxXIIA, VxXIIB,  
768 and VxXIIC from *Conus vexillum*. *J. Biol. Chem.* **2006**, *281*, 24745–24755.
- 769
- 770 26. Pluzhinikov, K.; Nol'de, D.; Tertyshnikova, S.; Sukhanov, S.; Sobol, A.; Torgov, M.; Filippov, A.;  
771 Arsen'ev, A.; Grishin, E., Structure-activity study of the basic toxic component of venom from the ant  
772 *Ectatomma tuberculatum*. *Bioorg Khim.* **1994**, *20*, 857–871.
- 773
- 774 27. Wanandy, T.; Gueven, N.; Davies, N. W.; Brown, S. G. A.; Wiese, M. D., Pilsosulins: A review of the  
775 structure and mode of action of venom peptides from an Australian ant *Myrmecia pilosula*. *Toxicon*  
776 **2015**, *98*, 54–61.
- 777
- 778 28. Kazuma, K.; Masuko, K.; Konni, K.; Inagaki, H. Combined venom gland transcriptomic and  
779 peptidomic analysis of the predatory ant *Odontomachus monticola*. *Toxins* **2013**, *9*, 323.
- 780

- 781 29. Moreau, C. S.; Bell, C. D.; Vila, R.; Archibald, S. B.; Pierce, N. E., Phylogeny of the ants:  
782 diversification in the age of angiosperms. *Science* **2006**, 312 (5770), 101-104.  
783
- 784 30. Touchard, A.; Aili, S. R.; Téné, N.; Barassé, V.; Klopp, C.; Dejean, A.; Kini, R. M.; Mrinalini; Coquet,  
785 L.; Jouenne, T.; Lefranc, B.; Leprince, J.; Escoubas, P.; Nicholson, G. M.; Treilhou, M.; Bonnafé, E.,  
786 Venom peptide repertoire of the European myrmicine ant *Manica rubida*: identification of insecticidal  
787 toxins. *J. Proteome Res.* **2020**, 19 (4), 1800-1811.  
788
- 789 31. Orivel, J.; Redeker, V.; Le Caer, J. P.; Krier, F.; Revol-Junelles, A. M.; Longeon, A.; Chaffotte, A.;  
790 Dejean, A.; Rossier, J., Ponericins, new antibacterial and insecticidal peptides from the venom of the  
791 ant *Pachycondyla goeldii*. *J Biol Chem* **2001**, 276 (21), 17823-9.  
792
- 793 32. Maschwitz, U.; Hahn, M.; Schönege, P., Paralysis of prey in ponerine ants. *Naturwissenschaften*  
794 **1979**, 66 (4), 213-214.  
795
- 796 33. Orivel, J.; Dejean, A., Comparative effect of the venoms of ants of the genus *Pachycondyla*  
797 (Hymenoptera: Ponerinae). *Toxicon* **2001**, 39 (2-3), 195-201.  
798
- 799 34. Undheim, E. A.; Grimm, L. L.; Low, C.-F.; Morgenstern, D.; Herzig, V.; Zobel-Thropp, P.; Pineda, S.  
800 S.; Habib, R.; Dziemborowicz, S.; Fry, B. G., Weaponization of a hormone: convergent recruitment of  
801 hyperglycemic hormone into the venom of arthropod predators. *Structure* **2015**, 23 (7), 1283-1292.  
802
- 803 35. Bende, N. S.; Dziemborowicz, S.; Mobli, M.; Herzig, V.; Gilchrist, J.; Wagner, J.; Nicholson, G. M.;  
804 King, G. F.; Bosmans, F., A distinct sodium channel voltage-sensor locus determines insect selectivity  
805 of the spider toxin Dc1a. *Nat Commun* **2014**, 5, 4350-4350.  
806

- 807 36. de Araujo, A. D.; Herzig, V.; Windley, M. J.; Dziemborowicz, S.; Mobli, M.; Nicholson, G. M.;  
808 Alewood, P. F.; King, G. F., Do vicinal disulfide bridges mediate functionally important redox  
809 transformations in proteins? *Antioxidants & Redox Signaling* **2013**, 19 (16), 1976-1980.
- 810
- 811 37. Nixon, S.A.; Dekan, Z.; Robinson, S.D.; Guo, S.; Vetter, I.; Kotze, A.C.; Alewood, P.F.; King, G.F.;  
812 Herzig, V. It Takes Two: Dimerization Is Essential for the Broad-Spectrum Predatory and Defensive  
813 Activities of the Venom Peptide Mp1a from the Jack Jumper Ant *Myrmecia*  
814 *pilosula*. *Biomedicines* **2020**, 8, 185.
- 815
- 816 38. Verly, R. M.; Resende, J. M.; Junior, E. F.; De Magalhães, M. T.; Guimarães, C. F.; Munhoz, V. H.;  
817 Bemquerer, M. P.; Almeida, F. C.; Santoro, M. M.; Piló-Veloso, D., Structure and membrane interactions  
818 of the homodimeric antibiotic peptide homotarsinin. *Scientific reports* **2017**, 7 (1), 1-13.
- 819
- 820 39. Dalla Serra, M.; Cirioni, O.; Vitale, R. M.; Renzone, G.; Coraiola, M.; Giacometti, A.; Potrich, C.;  
821 Baroni, E.; Guella, G.; Sanseverino, M.; De Luca, S.; Scalise, G.; Amodeo, P.; Scaloni, A. Structural  
822 features of distinctin affecting peptide biological and biochemical properties. *Biochemistry* **2008**, 47 (30),  
823 7888-7899.
- 824
- 825 40. Batista, C. V.; Scaloni, A.; Rigden, D. J.; Silva, L. R.; Rodrigues Romero, A.; Dukor, R.; Sebben, A.;  
826 Talamo, F.; Bloch, C. A novel heterodimeric antimicrobial peptide from the tree-frog *Phyllomedusa*  
827 *distincta*. *FEBS letters* **2001**, 494 (1-2), 85-89.
- 828
- 829 41. Raimondo, D.; Andreotti, G.; Saint, N.; Amodeo, P.; Renzone, G.; Sanseverino, M.; Zocchi, I.; Molle,  
830 G.; Motta, A.; Scaloni, A., A folding-dependent mechanism of antimicrobial peptide resistance to  
831 degradation unveiled by solution structure of distinctin. *Proc Natl Acad Sci USA* **2005**, 102 (18), 6309-  
832 6314.
- 833

- 834 42. Chen, Y.; Yang, C.; Li, T.; Zhang, M.; Liu, Y.; Gauthier, M. A.; Zhao, Y.; Wu, C., The interplay of  
835 disulfide bonds,  $\alpha$ -helicity, and hydrophobic interactions leads to ultrahigh proteolytic stability of  
836 peptides. *Biomacromolecules* **2015**, 16 (8), 2347-2355.
- 837
- 838 43. Undheim, E.A.B.; Mobli, M.; King, G.F. Toxin structures as evolutionary tools: using conserved 3D  
839 folds to study the evolutionary trajectory of rapidly evolving peptides. *BioEssays* **2016**, 38, 539-548.
- 840
- 841
- 842 44. Herzig, V.; King, G. F., The cystine knot is responsible for the exceptional stability of the insecticidal  
843 spider toxin  $\omega$ -Hexatoxin-Hv1a. *Toxins* **2015**, 7 (10), 4366-4380.
- 844
- 845 45. Yang, S.; Xiao, Y.; Kang, D.; Liu, J.; Li, Y.; Undheim, E. A. B.; Klint, J. K.; Rong, M.; Lai, R.; King,  
846 G. F., Discovery of a selective Na<sub>v</sub>1.7 inhibitor from centipede venom with analgesic efficacy exceeding  
847 morphine in rodent pain models. *Proc Natl Acad Sci USA* **2013**, 110 (43), 17534-17539.
- 848
- 849 46. Téné, N.; Bonnafé, E.; Berger, F.; Rifflet, A.; Guilhaudis, L.; Ségalas-Milazzo, I.; Pipy, B.; Coste, A.;  
850 Leprince, J.; Treilhou, M., Biochemical and biophysical combined study of bicarinalin, an ant venom  
851 antimicrobial peptide. *Peptides* **2016**, 79, 103-113.
- 852
- 853 47. Kim, H.; Jang, J. H.; Kim, S. C.; Cho, J. H., De novo generation of short antimicrobial peptides with  
854 enhanced stability and cell specificity. *Journal of Antimicrobial Chemotherapy* **2013**, 69 (1), 121-132.
- 855
- 856 48. Bernard J, M.; Kara, P.; Lisa Cencia, R.; Phillip W, G., Degradation of naturally occurring and  
857 engineered antimicrobial peptides by proteases. *Advances in Bioscience and Biotechnology* **2011**,  
858 2011.
- 859

- 860 49. Nolde, D. E.; Sobol, A. G.; Pluzhnikov, K. A.; Grishin, E. V.; Arseniev, A. S., Three-dimensional  
861 structure of ectatomin from *Ectatomma tuberculatum* ant venom. *J Biomol NMR* **1995**, 5 (1), 1-13.  
862
- 863 50. Tseng, T.-S.; Tsai, K.-C.; Chen, C., Characterizing the structure–function relationship reveals the  
864 mode of action of a novel antimicrobial peptide, P1, from jumper ant *Myrmecia pilosula*. *Molecular*  
865 *BioSystems* **2017**, 13 (6), 1193-1201.  
866
- 867 51. Pluzhnikov, K.; Nosyreva, E.; Shevchenko, L.; Kokoz, Y.; Schmalz, D.; Hucho, F.; Grishin, E.  
868 Analysis of ectatomin action on cell membranes. *Eur. J. Biochem.* **1999**, 262, 501–506.  
869
- 870 52. Carrasco-Pozo, C.; Pastene, E.; Vergara, C.; Zapata, M.; Sandoval, C.; Gotteland, M. Stimulation  
871 of cytosolic and mitochondrial calcium mobilization by indomethacin in Caco-2 cells: Modulation by the  
872 polyphenols quercetin, resveratrol and rutin. *Biochim. Biophys. Acta* **2012**, 1820, 2052–2061.  
873
- 874 53. Gieseler, A.; Schultze, A. T.; Kupsch, K.; Haroon, M. F.; Wolf, G.; Siemen, D.; Kreutzmann, P.  
875 Inhibitory modulation of the mitochondrial permeability transition by minocycline. *Biochem. Pharmacol.*  
876 **2009**, 77, 888–896.  
877
- 878 54. Vidau, C.; Brunet, J. L.; Badiou, A.; Belzunces, L. P. Phenylpyrazole insecticides induce cytotoxicity  
879 by altering mechanisms involved in cellular energy supply in the human epithelial cell model Caco-2.  
880 *Toxicol. in Vitro* **2009**, 23, 589–597.  
881
- 882 55. Wu, X.; Hong, H.; Yue, J.; Wu, Y.; Li, X.; Jiang, L.; Li, L.; Li, Q.; Gao, G.; Yang, X. Inhibitory effect  
883 of small interfering RNA on dengue virus replication in mosquito cells. *Virology journal* **2010**, 7, 270.  
884

- 885 56. Minamino, M.; Hara, M.; Ohnishi, S.; Irie, T.; Yamashita, T.; Minato, A.; Inagaki, C. Effects of protein  
886 kinase and phosphatase inhibitors on slow shortening of guinea pig cochlear outer hair cells. *Brain Res*  
887 **1998**, *781*, 275–283.
- 888
- 889 57. Miyazaki, H.; Shiozaki, A.; Niisato, N.; Marunaka, Y. Physiological significance of hypotonicity-  
890 induced regulatory volume decrease: reduction in intracellular Cl<sup>-</sup> concentration acting as an  
891 intracellular signaling. *Am. J. Physiol. Renal Physiol.* **2007**, *292*, F1411–F1417.
- 892
- 893 58. Wang, X. Q.; Li, Y. G.; Zhong, S.; Zhang, H.; Wang, X. Y.; Qi, P. P.; Xu, H. Oxidative injury is  
894 involved in fipronil-induced G2/M phase arrest and apoptosis in *Spodoptera frugiperda* (Sf9) cell line.  
895 *Pesti. Biochem. Phys.* **2013**, *105*, 122–130.
- 896
- 897 59. Meier, S. D.; Kovalchuk, Y.; Rose, C. R. Properties of the new fluorescent Na<sup>+</sup> indicator CoroNa  
898 Green: comparison with SBFI and confocal Na<sup>+</sup> imaging. *J. Neurosci. Methods* **2006**, *155*, 251–259.
- 899
- 900 60. Sousa, S. R.; Wingerd, J. S.; Brust, A.; Bladen, C.; Ragnarsson, L.; Herzig, V.; Deuis, J. R.; Dutertre,  
901 S.; Vetter, I.; Zamponi, G. W., Discovery and mode of action of a novel analgesic  $\beta$ -toxin from the African  
902 spider *Ceratogyrus darlingi*. *PloS one* **2017**, *12* (9).
- 903
- 904 61. Herzig, V.; Hodgson, W. C., Neurotoxic and insecticidal properties of venom from the Australian  
905 theraphosid spider *Selenotholus foelschei*. *Neurotoxicology* **2008**, *29* (3), 471-475.
- 906
- 907 62. Baker, N.A.; Sept, D.; Joseph, S.; Holst, M.J.; McCammon, J.A. Electrostatics of nanosystems:  
908 application to microtubules and the ribosome. *Proc. Natl. Acad. Sci. U. S. A.* **2001**, *98*, 10037–10041.
- 909

910 63. Pyrkov, T.V.; Chugunov, A.O.; Krylov, N.A.; Nolde, D.E.; Efremov, R.G. PLATINUM: a web tool for  
911 analysis of hydrophobic/hydrophilic organization of biomolecular complexes. *Bioinforma. Oxf. Engl.*  
912 **2009**, 25, 1201–1202.  
913
